# Supplementary material for: Natural Compounds as DPP-4 Inhibitors: 3D-Similarity Search, ADME Toxicity, and Molecular Docking Approaches
Source: MDPI journal article supplement (doi:10.3390/sym14091842), 2022-09-05
Supplement: s1 [file s1]

Supplementary material

# Natural compounds as DPP-4 inhibitors: 3D similarity search, ADME toxicity, and molecular docking approaches

Daniela Istrate <sup>1</sup>, and Luminita Crisan <sup>1,\*</sup>

<sup>1</sup> “Coriolan Dragulescu” Institute of Chemistry, 24 M. Viteazu Avenue, 300223 Timisoara, Romania

\* Correspondence: [lumi\\_crisan@acad-icht.tm.edu.ro](mailto:lumi_crisan@acad-icht.tm.edu.ro)

**Table S1.** The selected NPs by best 3D-similarity coefficients vs linagliptin (Tanimoto Combo, TC >1, ShapeTanimoto, ShT >0.75, and Combo Score, CS >1.2)

| Name         | TC    | ShT   | CS    | Name        | TC    | ShT   | CS    | Name         | TC    | ShT   | CS    |
|--------------|-------|-------|-------|-------------|-------|-------|-------|--------------|-------|-------|-------|
| ZINC1094329  | 1.328 | 0.807 | 1.345 | ZINC5387327 | 1.196 | 0.761 | 1.259 | ZINC8926323  | 1.169 | 0.760 | 1.258 |
| ZINC8916385  | 1.323 | 0.800 | 1.340 | ZINC8926342 | 1.196 | 0.761 | 1.259 | ZINC4116049  | 1.168 | 0.758 | 1.236 |
| ZINC789645   | 1.303 | 0.781 | 1.320 | ZINC8589983 | 1.195 | 0.760 | 1.258 | ZINC13116156 | 1.167 | 0.781 | 1.258 |
| ZINC838142   | 1.302 | 0.781 | 1.319 | ZINC2488345 | 1.194 | 0.759 | 1.257 | ZINC1108640  | 1.167 | 0.757 | 1.235 |
| ZINC832612   | 1.279 | 0.790 | 1.330 | ZINC9601609 | 1.194 | 0.758 | 1.257 | ZINC640985   | 1.167 | 0.752 | 1.234 |
| ZINC2334127  | 1.267 | 0.780 | 1.318 | ZINC9601608 | 1.192 | 0.783 | 1.281 | ZINC9601615  | 1.162 | 0.776 | 1.254 |
| ZINC1094334  | 1.266 | 0.780 | 1.318 | ZINC8606274 | 1.187 | 0.770 | 1.254 | ZINC13142224 | 1.161 | 0.774 | 1.252 |
| ZINC6565526  | 1.250 | 0.763 | 1.301 | ZINC838204  | 1.184 | 0.751 | 1.269 | ZINC12296449 | 1.097 | 0.757 | 1.228 |
| ZINC13512682 | 1.215 | 0.805 | 1.283 | ZINC2488384 | 1.178 | 0.791 | 1.269 | ZINC33833997 | 1.048 | 0.785 | 1.291 |
| ZINC6732655  | 1.206 | 0.796 | 1.274 | ZINC838200  | 1.171 | 0.769 | 1.260 | ZINC33833796 | 1.016 | 0.762 | 1.268 |
| ZINC9601596  | 1.203 | 0.767 | 1.266 | ZINC2488377 | 1.170 | 0.760 | 1.238 | ZINC84153787 | 1.004 | 0.768 | 1.273 |
| ZINC2488364  | 1.202 | 0.792 | 1.270 | ZINC4147162 | 1.169 | 0.783 | 1.261 |              |       |       |       |

**Table S2.** The selected NPs by best 3D-similarity coefficients vs sitagliptin (Tanimoto Combo, TC >1, ShapeTanimoto, ShT >0.75, and Combo Score, CS >1.2)

| Name          | TC    | ShT   | CS    | Name          | TC    | ShT   | CS    | Name          | TC    | ShT   | CS    |
|---------------|-------|-------|-------|---------------|-------|-------|-------|---------------|-------|-------|-------|
| ZINC253398618 | 1.294 | 0.788 | 1.376 | ZINC85879230  | 1.078 | 0.785 | 1.238 | ZINC85876049  | 1.043 | 0.771 | 1.226 |
| ZINC89363727  | 1.284 | 0.777 | 1.366 | ZINC72324985  | 1.076 | 0.794 | 1.261 | ZINC217722740 | 1.043 | 0.831 | 1.224 |
| ZINC59572517  | 1.248 | 0.786 | 1.379 | ZINC90130383  | 1.076 | 0.752 | 1.242 | ZINC2151699   | 1.042 | 0.781 | 1.221 |
| ZINC136757666 | 1.211 | 0.784 | 1.383 | ZINC12389255  | 1.076 | 0.760 | 1.240 | ZINC96114431  | 1.041 | 0.755 | 1.339 |
| ZINC85876175  | 1.200 | 0.818 | 1.405 | ZINC20762885  | 1.075 | 0.759 | 1.239 | ZINC72324714  | 1.040 | 0.756 | 1.254 |
| ZINC604405970 | 1.200 | 0.766 | 1.333 | ZINC604403934 | 1.073 | 0.789 | 1.231 | ZINC96296242  | 1.040 | 0.758 | 1.225 |
| ZINC12296782  | 1.195 | 0.781 | 1.367 | ZINC36370102  | 1.073 | 0.753 | 1.207 | ZINC524732317 | 1.039 | 0.782 | 1.243 |
| ZINC2508009   | 1.187 | 0.752 | 1.321 | ZINC8614482   | 1.072 | 0.769 | 1.293 | ZINC10146685  | 1.038 | 0.762 | 1.222 |
| ZINC89914549  | 1.171 | 0.773 | 1.378 | ZINC96112842  | 1.072 | 0.784 | 1.259 | ZINC6767083   | 1.038 | 0.770 | 1.220 |
| ZINC96114503  | 1.167 | 0.768 | 1.374 | ZINC2123570   | 1.072 | 0.801 | 1.228 | ZINC2121295   | 1.037 | 0.751 | 1.278 |
| ZINC218315564 | 1.158 | 0.775 | 1.363 | ZINC40313093  | 1.070 | 0.806 | 1.250 | ZINC226848468 | 1.037 | 0.792 | 1.210 |
| ZINC12296887  | 1.153 | 0.778 | 1.358 | ZINC2707927   | 1.070 | 0.775 | 1.230 | ZINC96115667  | 1.035 | 0.786 | 1.259 |
| ZINC85879571  | 1.149 | 0.789 | 1.352 | ZINC381318    | 1.070 | 0.758 | 1.204 | ZINC72324924  | 1.035 | 0.764 | 1.217 |
| ZINC20676820  | 1.146 | 0.782 | 1.382 | ZINC20761191  | 1.067 | 0.788 | 1.252 | ZINC8611816   | 1.034 | 0.751 | 1.275 |
| ZINC217928409 | 1.139 | 0.755 | 1.344 | ZINC2120824   | 1.066 | 0.787 | 1.277 | ZINC6766260   | 1.033 | 0.777 | 1.236 |
| ZINC89915303  | 1.138 | 0.768 | 1.308 | ZINC79193641  | 1.066 | 0.751 | 1.200 | ZINC30952814  | 1.033 | 0.757 | 1.216 |
| ZINC217927992 | 1.137 | 0.754 | 1.342 | ZINC6075837   | 1.064 | 0.786 | 1.221 | ZINC4046819   | 1.032 | 0.760 | 1.214 |
| ZINC12296682  | 1.137 | 0.753 | 1.342 | ZINC96115407  | 1.063 | 0.762 | 1.224 | ZINC79194115  | 1.031 | 0.759 | 1.239 |
| ZINC20715640  | 1.133 | 0.794 | 1.395 | ZINC4074101   | 1.063 | 0.791 | 1.218 | ZINC8764612   | 1.031 | 0.754 | 1.214 |
| ZINC12322314  | 1.132 | 0.766 | 1.336 | ZINC96116537  | 1.062 | 0.787 | 1.300 | ZINC96112029  | 1.030 | 0.762 | 1.238 |
| ZINC96116458  | 1.128 | 0.752 | 1.299 | ZINC6766255   | 1.061 | 0.786 | 1.245 | ZINC253389136 | 1.028 | 0.795 | 1.267 |
| ZINC11692316  | 1.126 | 0.773 | 1.361 | ZINC12895627  | 1.061 | 0.762 | 1.222 | ZINC85878975  | 1.028 | 0.753 | 1.212 |
| ZINC12296795  | 1.125 | 0.786 | 1.356 | ZINC72325880  | 1.058 | 0.765 | 1.246 | ZINC8765456   | 1.028 | 0.755 | 1.210 |
| ZINC10384610  | 1.117 | 0.796 | 1.252 | ZINC943432    | 1.058 | 0.758 | 1.220 | ZINC170625251 | 1.027 | 0.750 | 1.238 |

|               |       |       |       |               |       |       |       |              |       |       |       |
|---------------|-------|-------|-------|---------------|-------|-------|-------|--------------|-------|-------|-------|
| ZINC2096678   | 1.114 | 0.760 | 1.316 | ZINC72325031  | 1.058 | 0.773 | 1.216 | ZINC6075833  | 1.027 | 0.770 | 1.205 |
| ZINC72324690  | 1.112 | 0.786 | 1.247 | ZINC5956697   | 1.057 | 0.779 | 1.214 | ZINC96116557 | 1.026 | 0.759 | 1.207 |
| ZINC6912954   | 1.108 | 0.755 | 1.212 | ZINC6075832   | 1.056 | 0.777 | 1.213 | ZINC8490844  | 1.025 | 0.782 | 1.246 |
| ZINC96114432  | 1.107 | 0.767 | 1.307 | ZINC9900130   | 1.054 | 0.761 | 1.242 | ZINC8587150  | 1.025 | 0.769 | 1.228 |
| ZINC253395761 | 1.107 | 0.755 | 1.210 | ZINC945277    | 1.054 | 0.756 | 1.215 | ZINC96116527 | 1.022 | 0.774 | 1.246 |
| ZINC10384551  | 1.102 | 0.781 | 1.237 | ZINC2707925   | 1.054 | 0.764 | 1.213 | ZINC2126493  | 1.022 | 0.762 | 1.226 |
| ZINC2998244   | 1.101 | 0.780 | 1.236 | ZINC96269279  | 1.053 | 0.772 | 1.238 | ZINC20427677 | 1.022 | 0.764 | 1.225 |
| ZINC90000481  | 1.099 | 0.783 | 1.323 | ZINC265220    | 1.053 | 0.754 | 1.215 | ZINC20616123 | 1.022 | 0.751 | 1.204 |
| ZINC2113602   | 1.099 | 0.819 | 1.256 | ZINC35045981  | 1.052 | 0.827 | 1.287 | ZINC13583976 | 1.020 | 0.752 | 1.202 |
| ZINC2707930   | 1.099 | 0.779 | 1.234 | ZINC8587149   | 1.052 | 0.776 | 1.235 | ZINC85878476 | 1.019 | 0.775 | 1.216 |
| ZINC9902281   | 1.099 | 0.773 | 1.234 | ZINC40312847  | 1.052 | 0.788 | 1.232 | ZINC96296243 | 1.017 | 0.755 | 1.222 |
| ZINC21646922  | 1.097 | 0.782 | 1.321 | ZINC72324571  | 1.052 | 0.751 | 1.214 | ZINC4046623  | 1.014 | 0.765 | 1.213 |
| ZINC72324535  | 1.096 | 0.770 | 1.231 | ZINC72324692  | 1.052 | 0.751 | 1.213 | ZINC35361886 | 1.013 | 0.787 | 1.248 |
| ZINC85878147  | 1.095 | 0.796 | 1.256 | ZINC85875372  | 1.051 | 0.755 | 1.212 | ZINC6767084  | 1.013 | 0.763 | 1.213 |
| ZINC89916271  | 1.094 | 0.763 | 1.260 | ZINC20760451  | 1.050 | 0.751 | 1.326 | ZINC12899028 | 1.013 | 0.769 | 1.210 |
| ZINC85876531  | 1.094 | 0.796 | 1.255 | ZINC4043624   | 1.050 | 0.773 | 1.207 | ZINC12663453 | 1.012 | 0.754 | 1.216 |
| ZINC6912833   | 1.091 | 0.768 | 1.226 | ZINC170625248 | 1.049 | 0.790 | 1.253 | ZINC12893479 | 1.011 | 0.754 | 1.214 |
| ZINC8762389   | 1.086 | 0.771 | 1.250 | ZINC12296927  | 1.048 | 0.764 | 1.206 | ZINC85875832 | 1.009 | 0.780 | 1.222 |
| ZINC2707928   | 1.086 | 0.765 | 1.220 | ZINC2115413   | 1.047 | 0.788 | 1.225 | ZINC4046622  | 1.008 | 0.766 | 1.205 |
| ZINC72324473  | 1.084 | 0.768 | 1.218 | ZINC72324751  | 1.046 | 0.780 | 1.279 | ZINC35442480 | 1.007 | 0.766 | 1.227 |
| ZINC96116515  | 1.083 | 0.750 | 1.344 | ZINC2120822   | 1.046 | 0.802 | 1.243 | ZINC79192051 | 1.006 | 0.750 | 1.234 |
| ZINC20762547  | 1.082 | 0.763 | 1.246 | ZINC12296399  | 1.046 | 0.755 | 1.234 | ZINC4040633  | 1.006 | 0.766 | 1.201 |
| ZINC20761936  | 1.082 | 0.805 | 1.239 | ZINC72326026  | 1.046 | 0.753 | 1.234 | ZINC4046932  | 1.005 | 0.760 | 1.203 |
| ZINC6912811   | 1.082 | 0.760 | 1.217 | ZINC41428634  | 1.044 | 0.752 | 1.232 | ZINC96112189 | 1.001 | 0.751 | 1.226 |
| ZINC30615924  | 1.079 | 0.777 | 1.270 | ZINC6075836   | 1.044 | 0.765 | 1.201 | ZINC35361885 | 1.000 | 0.759 | 1.220 |

**Table S3.** The selected NPs by best 3D-similarity coefficients vs alogliptin (Tanimoto Combo, TC >1, ShapeTanimoto, ShT >0.75, and Combo Score, CS >1.2)

| Name          | TC    | ShT   | CS    | Name          | TC    | ShT   | CS    | Name          | TC    | ShT   | CS    |
|---------------|-------|-------|-------|---------------|-------|-------|-------|---------------|-------|-------|-------|
| ZINC1000110   | 1.317 | 0.834 | 1.449 | ZINC487437    | 1.094 | 0.775 | 1.259 | ZINC677506    | 1.052 | 0.751 | 1.239 |
| ZINC14961096  | 1.276 | 0.883 | 1.416 | ZINC36025434  | 1.094 | 0.914 | 1.218 | ZINC8926363   | 1.052 | 0.766 | 1.235 |
| ZINC1789891   | 1.274 | 0.813 | 1.374 | ZINC525915112 | 1.093 | 0.842 | 1.556 | ZINC568533    | 1.052 | 0.772 | 1.209 |
| ZINC1789905   | 1.270 | 0.822 | 1.372 | ZINC95913545  | 1.093 | 0.828 | 1.480 | ZINC59586736  | 1.051 | 0.816 | 1.493 |
| ZINC1791330   | 1.258 | 0.810 | 1.360 | ZINC4098455   | 1.093 | 0.757 | 1.399 | ZINC85644634  | 1.051 | 0.847 | 1.431 |
| ZINC6720720   | 1.247 | 0.828 | 1.386 | ZINC604404518 | 1.093 | 0.761 | 1.343 | ZINC1101493   | 1.051 | 0.750 | 1.239 |
| ZINC19703085  | 1.241 | 0.853 | 1.505 | ZINC9781377   | 1.093 | 0.757 | 1.259 | ZINC13738998  | 1.051 | 0.789 | 1.228 |
| ZINC330295    | 1.237 | 0.762 | 1.334 | ZINC6569127   | 1.091 | 0.831 | 1.542 | ZINC5126030   | 1.050 | 0.756 | 1.236 |
| ZINC100632953 | 1.234 | 0.819 | 1.406 | ZINC14806402  | 1.091 | 0.763 | 1.312 | ZINC225438310 | 1.050 | 0.787 | 1.203 |
| ZINC5444758   | 1.229 | 0.824 | 1.400 | ZINC1446419   | 1.091 | 0.754 | 1.258 | ZINC4044108   | 1.049 | 0.779 | 1.252 |
| ZINC217991216 | 1.229 | 0.796 | 1.366 | ZINC1127268   | 1.091 | 0.772 | 1.256 | ZINC4026036   | 1.049 | 0.880 | 1.233 |
| ZINC6499528   | 1.224 | 0.860 | 1.394 | ZINC5441698   | 1.091 | 0.757 | 1.202 | ZINC976542    | 1.049 | 0.789 | 1.224 |
| ZINC1245404   | 1.223 | 0.808 | 1.394 | ZINC119512    | 1.091 | 0.775 | 1.201 | ZINC49542475  | 1.048 | 0.770 | 1.254 |
| ZINC872110    | 1.222 | 0.846 | 1.363 | ZINC95099212  | 1.090 | 0.829 | 1.588 | ZINC4083211   | 1.048 | 0.763 | 1.207 |
| ZINC189799    | 1.222 | 0.793 | 1.327 | ZINC85531793  | 1.090 | 0.821 | 1.551 | ZINC13515283  | 1.047 | 0.808 | 1.516 |
| ZINC942551    | 1.217 | 0.788 | 1.322 | ZINC28540146  | 1.090 | 0.829 | 1.543 | ZINC95912387  | 1.047 | 0.790 | 1.494 |
| ZINC706774    | 1.214 | 0.784 | 1.319 | ZINC192293    | 1.090 | 0.823 | 1.245 | ZINC95914670  | 1.047 | 0.772 | 1.492 |
| ZINC2091112   | 1.206 | 0.875 | 1.400 | ZINC5728766   | 1.089 | 0.772 | 1.280 | ZINC4097731   | 1.047 | 0.819 | 1.480 |
| ZINC872109    | 1.206 | 0.839 | 1.347 | ZINC622396    | 1.089 | 0.766 | 1.200 | ZINC253398313 | 1.047 | 0.772 | 1.204 |
| ZINC1458727   | 1.206 | 0.820 | 1.346 | ZINC2867973   | 1.089 | 0.758 | 1.200 | ZINC4102354   | 1.046 | 0.832 | 1.498 |
| ZINC151198    | 1.205 | 0.760 | 1.410 | ZINC33833729  | 1.088 | 0.825 | 1.518 | ZINC25763686  | 1.046 | 0.791 | 1.491 |
| ZINC217940798 | 1.204 | 0.796 | 1.344 | ZINC38396388  | 1.088 | 0.866 | 1.452 | ZINC33831146  | 1.046 | 0.794 | 1.487 |
| ZINC5730717   | 1.204 | 0.810 | 1.343 | ZINC263585279 | 1.088 | 0.782 | 1.277 | ZINC33832524  | 1.046 | 0.829 | 1.464 |
| ZINC490166    | 1.202 | 0.752 | 1.338 | ZINC1133310   | 1.088 | 0.751 | 1.255 | ZINC13056335  | 1.046 | 0.796 | 1.241 |
| ZINC941313    | 1.200 | 0.771 | 1.305 | ZINC14952519  | 1.087 | 0.828 | 1.537 | ZINC838160    | 1.046 | 0.786 | 1.221 |
| ZINC36646378  | 1.195 | 0.753 | 1.332 | ZINC1094337   | 1.087 | 0.768 | 1.252 | ZINC225434522 | 1.046 | 0.783 | 1.200 |
| ZINC525500    | 1.195 | 0.777 | 1.301 | ZINC59872849  | 1.086 | 0.852 | 1.548 | ZINC33833455  | 1.045 | 0.788 | 1.492 |

|               |       |       |       |               |       |       |       |              |       |       |       |
|---------------|-------|-------|-------|---------------|-------|-------|-------|--------------|-------|-------|-------|
| ZINC1142676   | 1.193 | 0.763 | 1.298 | ZINC9147122   | 1.086 | 0.825 | 1.537 | ZINC2306198  | 1.045 | 0.778 | 1.223 |
| ZINC1152507   | 1.189 | 0.760 | 1.293 | ZINC9781351   | 1.086 | 0.772 | 1.276 | ZINC838181   | 1.045 | 0.781 | 1.222 |
| ZINC6556411   | 1.188 | 0.774 | 1.360 | ZINC238783892 | 1.085 | 0.823 | 1.537 | ZINC13512151 | 1.045 | 0.785 | 1.221 |
| ZINC100495199 | 1.187 | 0.794 | 1.264 | ZINC789648    | 1.084 | 0.769 | 1.274 | ZINC067657   | 1.045 | 0.826 | 1.206 |
| ZINC524730033 | 1.185 | 0.755 | 1.323 | ZINC13424725  | 1.083 | 0.846 | 1.548 | ZINC70455510 | 1.044 | 0.784 | 1.518 |
| ZINC5907073   | 1.183 | 0.779 | 1.355 | ZINC59765889  | 1.083 | 0.839 | 1.536 | ZINC59771847 | 1.044 | 0.834 | 1.469 |
| ZINC20760691  | 1.182 | 0.817 | 1.322 | ZINC5728767   | 1.083 | 0.766 | 1.274 | ZINC59764680 | 1.044 | 0.811 | 1.462 |
| ZINC4170026   | 1.181 | 0.834 | 1.321 | ZINC9601619   | 1.083 | 0.769 | 1.273 | ZINC31164103 | 1.044 | 0.800 | 1.453 |
| ZINC832607    | 1.178 | 0.839 | 1.317 | ZINC604406189 | 1.083 | 0.755 | 1.249 | ZINC2344777  | 1.044 | 0.768 | 1.225 |
| ZINC218066667 | 1.175 | 0.776 | 1.346 | ZINC9781391   | 1.083 | 0.770 | 1.246 | ZINC31164099 | 1.043 | 0.792 | 1.505 |
| ZINC838145    | 1.175 | 0.837 | 1.314 | ZINC4540569   | 1.082 | 0.798 | 1.290 | ZINC70454560 | 1.043 | 0.822 | 1.467 |
| ZINC9782470   | 1.174 | 0.827 | 1.314 | ZINC2488348   | 1.082 | 0.769 | 1.272 | ZINC59726158 | 1.043 | 0.822 | 1.467 |
| ZINC851616    | 1.173 | 0.835 | 1.312 | ZINC1446420   | 1.082 | 0.769 | 1.272 | ZINC95486354 | 1.043 | 0.829 | 1.416 |
| ZINC1127254   | 1.172 | 0.835 | 1.312 | ZINC640993    | 1.082 | 0.790 | 1.267 | ZINC12402877 | 1.043 | 0.797 | 1.235 |
| ZINC2091110   | 1.171 | 0.854 | 1.362 | ZINC31160874  | 1.082 | 0.811 | 1.261 | ZINC3894228  | 1.043 | 0.752 | 1.228 |
| ZINC12438112  | 1.171 | 0.835 | 1.310 | ZINC838163    | 1.082 | 0.822 | 1.258 | ZINC4349710  | 1.042 | 0.832 | 1.467 |
| ZINC707150    | 1.170 | 0.838 | 1.336 | ZINC34685248  | 1.082 | 0.879 | 1.235 | ZINC12378086 | 1.042 | 0.775 | 1.220 |
| ZINC263586879 | 1.170 | 0.802 | 1.310 | ZINC180678    | 1.082 | 0.802 | 1.216 | ZINC13358870 | 1.042 | 0.776 | 1.219 |
| ZINC838148    | 1.169 | 0.830 | 1.308 | ZINC4349549   | 1.081 | 0.820 | 1.579 | ZINC2488382  | 1.042 | 0.780 | 1.218 |
| ZINC1448012   | 1.168 | 0.775 | 1.308 | ZINC4349372   | 1.081 | 0.847 | 1.542 | ZINC1626068  | 1.042 | 0.780 | 1.218 |
| ZINC263586880 | 1.167 | 0.843 | 1.306 | ZINC4812655   | 1.081 | 0.751 | 1.275 | ZINC079009   | 1.042 | 0.822 | 1.202 |
| ZINC753717    | 1.166 | 0.769 | 1.338 | ZINC20762493  | 1.081 | 0.767 | 1.272 | ZINC067653   | 1.042 | 0.822 | 1.202 |
| ZINC450480    | 1.166 | 0.791 | 1.306 | ZINC789712    | 1.081 | 0.764 | 1.272 | ZINC59765936 | 1.041 | 0.824 | 1.518 |
| ZINC12342485  | 1.166 | 0.827 | 1.305 | ZINC6815073   | 1.081 | 0.815 | 1.235 | ZINC39433939 | 1.041 | 0.835 | 1.442 |
| ZINC9782466   | 1.164 | 0.828 | 1.303 | ZINC225439439 | 1.081 | 0.784 | 1.216 | ZINC15830200 | 1.041 | 0.822 | 1.262 |
| ZINC13282205  | 1.164 | 0.825 | 1.303 | ZINC033179    | 1.080 | 0.884 | 1.267 | ZINC1127270  | 1.041 | 0.764 | 1.245 |
| ZINC863247    | 1.163 | 0.824 | 1.303 | ZINC9781410   | 1.080 | 0.778 | 1.242 | ZINC38472655 | 1.040 | 0.813 | 1.532 |
| ZINC044493    | 1.162 | 0.849 | 1.325 | ZINC067669    | 1.080 | 0.792 | 1.214 | ZINC4102357  | 1.040 | 0.846 | 1.405 |

|               |       |       |       |               |       |       |       |               |       |       |       |
|---------------|-------|-------|-------|---------------|-------|-------|-------|---------------|-------|-------|-------|
| ZINC12342488  | 1.162 | 0.818 | 1.302 | ZINC46153069  | 1.080 | 0.836 | 1.207 | ZINC838156    | 1.040 | 0.782 | 1.214 |
| ZINC13282203  | 1.160 | 0.816 | 1.300 | ZINC1807495   | 1.079 | 0.771 | 1.216 | ZINC8974182   | 1.040 | 0.790 | 1.212 |
| ZINC789709    | 1.160 | 0.823 | 1.299 | ZINC1095264   | 1.078 | 0.766 | 1.268 | ZINC9782440   | 1.039 | 0.762 | 1.244 |
| ZINC5095098   | 1.160 | 0.821 | 1.299 | ZINC36289482  | 1.077 | 0.863 | 1.255 | ZINC85510518  | 1.038 | 0.814 | 1.404 |
| ZINC5607398   | 1.159 | 0.795 | 1.329 | ZINC61997014  | 1.077 | 0.770 | 1.240 | ZINC85592725  | 1.038 | 0.812 | 1.242 |
| ZINC12393369  | 1.159 | 0.820 | 1.298 | ZINC627172    | 1.077 | 0.781 | 1.238 | ZINC754303    | 1.038 | 0.860 | 1.213 |
| ZINC1143247   | 1.158 | 0.764 | 1.298 | ZINC20762071  | 1.077 | 0.755 | 1.215 | ZINC13739028  | 1.038 | 0.778 | 1.213 |
| ZINC2334130   | 1.157 | 0.822 | 1.297 | ZINC225435746 | 1.077 | 0.780 | 1.212 | ZINC90711737  | 1.037 | 0.806 | 1.453 |
| ZINC151199    | 1.155 | 0.768 | 1.357 | ZINC21992895  | 1.076 | 0.822 | 1.566 | ZINC70454743  | 1.037 | 0.842 | 1.422 |
| ZINC706775    | 1.155 | 0.761 | 1.294 | ZINC84154015  | 1.076 | 0.823 | 1.497 | ZINC84154202  | 1.037 | 0.817 | 1.418 |
| ZINC753718    | 1.153 | 0.756 | 1.324 | ZINC4654800   | 1.076 | 0.863 | 1.468 | ZINC70454681  | 1.037 | 0.826 | 1.407 |
| ZINC832594    | 1.153 | 0.840 | 1.317 | ZINC1106316   | 1.076 | 0.751 | 1.324 | ZINC2502268   | 1.037 | 0.788 | 1.231 |
| ZINC2595059   | 1.153 | 0.819 | 1.292 | ZINC838158    | 1.076 | 0.818 | 1.251 | ZINC812594    | 1.037 | 0.798 | 1.226 |
| ZINC8926216   | 1.153 | 0.814 | 1.292 | ZINC14684628  | 1.075 | 0.811 | 1.530 | ZINC1756437   | 1.037 | 0.868 | 1.221 |
| ZINC5575620   | 1.151 | 0.757 | 1.323 | ZINC15830182  | 1.075 | 0.860 | 1.293 | ZINC85509713  | 1.036 | 0.804 | 1.516 |
| ZINC9782474   | 1.151 | 0.815 | 1.290 | ZINC253403806 | 1.075 | 0.778 | 1.210 | ZINC2008803   | 1.036 | 0.812 | 1.401 |
| ZINC12342483  | 1.151 | 0.813 | 1.290 | ZINC25763680  | 1.074 | 0.814 | 1.525 | ZINC12661119  | 1.036 | 0.769 | 1.260 |
| ZINC5484332   | 1.150 | 0.787 | 1.320 | ZINC256004463 | 1.074 | 0.841 | 1.492 | ZINC13282213  | 1.036 | 0.793 | 1.227 |
| ZINC450481    | 1.149 | 0.768 | 1.289 | ZINC8642820   | 1.074 | 0.812 | 1.251 | ZINC32066887  | 1.035 | 0.779 | 1.482 |
| ZINC6766372   | 1.149 | 0.755 | 1.289 | ZINC13739027  | 1.074 | 0.814 | 1.249 | ZINC4692014   | 1.035 | 0.817 | 1.475 |
| ZINC13282204  | 1.149 | 0.811 | 1.288 | ZINC281024    | 1.074 | 0.885 | 1.238 | ZINC680572    | 1.035 | 0.754 | 1.242 |
| ZINC625431    | 1.148 | 0.835 | 1.312 | ZINC20763682  | 1.074 | 0.752 | 1.212 | ZINC5483900   | 1.035 | 0.786 | 1.207 |
| ZINC5441686   | 1.147 | 0.767 | 1.317 | ZINC253500608 | 1.073 | 0.847 | 1.504 | ZINC33832113  | 1.034 | 0.819 | 1.429 |
| ZINC623390    | 1.147 | 0.832 | 1.312 | ZINC256004465 | 1.073 | 0.840 | 1.491 | ZINC40891808  | 1.034 | 0.768 | 1.421 |
| ZINC9782468   | 1.147 | 0.813 | 1.286 | ZINC33832091  | 1.073 | 0.851 | 1.435 | ZINC3984976   | 1.034 | 0.761 | 1.262 |
| ZINC604404074 | 1.146 | 0.753 | 1.348 | ZINC9601618   | 1.073 | 0.761 | 1.263 | ZINC524731654 | 1.034 | 0.752 | 1.240 |
| ZINC985539    | 1.145 | 0.814 | 1.339 | ZINC1425463   | 1.073 | 0.767 | 1.235 | ZINC104891686 | 1.033 | 0.802 | 1.449 |
| ZINC832608    | 1.144 | 0.832 | 1.307 | ZINC34065053  | 1.072 | 0.829 | 1.546 | ZINC137894960 | 1.032 | 0.819 | 1.405 |

|               |       |       |       |               |       |       |       |               |       |       |       |
|---------------|-------|-------|-------|---------------|-------|-------|-------|---------------|-------|-------|-------|
| ZINC652730    | 1.143 | 0.837 | 1.332 | ZINC14643574  | 1.072 | 0.791 | 1.351 | ZINC685935292 | 1.032 | 0.819 | 1.365 |
| ZINC044026    | 1.143 | 0.851 | 1.329 | ZINC100790789 | 1.072 | 0.757 | 1.262 | ZINC524730659 | 1.032 | 0.763 | 1.328 |
| ZINC1578553   | 1.142 | 0.777 | 1.282 | ZINC253529745 | 1.071 | 0.825 | 1.527 | ZINC13508152  | 1.032 | 0.770 | 1.324 |
| ZINC842264    | 1.140 | 0.825 | 1.304 | ZINC85948413  | 1.071 | 0.859 | 1.443 | ZINC38321668  | 1.031 | 0.759 | 1.471 |
| ZINC1127183   | 1.139 | 0.825 | 1.303 | ZINC13510653  | 1.071 | 0.757 | 1.262 | ZINC33832038  | 1.031 | 0.806 | 1.418 |
| ZINC789670    | 1.139 | 0.824 | 1.303 | ZINC694159    | 1.071 | 0.764 | 1.233 | ZINC824146928 | 1.031 | 0.754 | 1.212 |
| ZINC28641045  | 1.139 | 0.782 | 1.279 | ZINC217840572 | 1.071 | 0.750 | 1.209 | ZINC5126035   | 1.031 | 0.774 | 1.206 |
| ZINC1516664   | 1.138 | 0.846 | 1.323 | ZINC5612099   | 1.071 | 0.763 | 1.208 | ZINC39109040  | 1.030 | 0.765 | 1.418 |
| ZINC604404011 | 1.136 | 0.770 | 1.365 | ZINC5004613   | 1.070 | 0.835 | 1.534 | ZINC15830055  | 1.030 | 0.814 | 1.248 |
| ZINC20111175  | 1.136 | 0.820 | 1.353 | ZINC838184    | 1.070 | 0.807 | 1.246 | ZINC9781369   | 1.030 | 0.756 | 1.234 |
| ZINC100790987 | 1.134 | 0.796 | 1.301 | ZINC14952515  | 1.069 | 0.809 | 1.520 | ZINC85592762  | 1.030 | 0.788 | 1.221 |
| ZINC1463136   | 1.134 | 0.754 | 1.212 | ZINC4097706   | 1.069 | 0.845 | 1.495 | ZINC101192143 | 1.030 | 0.797 | 1.217 |
| ZINC5564120   | 1.131 | 0.767 | 1.300 | ZINC1004760   | 1.069 | 0.775 | 1.280 | ZINC754342    | 1.030 | 0.852 | 1.205 |
| ZINC9782397   | 1.131 | 0.820 | 1.295 | ZINC9601602   | 1.069 | 0.754 | 1.260 | ZINC70454402  | 1.029 | 0.803 | 1.520 |
| ZINC4416338   | 1.130 | 0.879 | 1.570 | ZINC13282210  | 1.069 | 0.771 | 1.256 | ZINC71316154  | 1.029 | 0.794 | 1.429 |
| ZINC12818365  | 1.129 | 0.775 | 1.269 | ZINC4098556   | 1.068 | 0.834 | 1.528 | ZINC3903396   | 1.029 | 0.785 | 1.221 |
| ZINC19793157  | 1.127 | 0.752 | 1.328 | ZINC14728216  | 1.068 | 0.760 | 1.310 | ZINC838170    | 1.028 | 0.785 | 1.220 |
| ZINC6350710   | 1.126 | 0.787 | 1.321 | ZINC1823150   | 1.068 | 0.771 | 1.255 | ZINC40312435  | 1.027 | 0.776 | 1.312 |
| ZINC8934438   | 1.125 | 0.804 | 1.263 | ZINC5126036   | 1.068 | 0.810 | 1.243 | ZINC1831406   | 1.027 | 0.862 | 1.208 |
| ZINC524729822 | 1.121 | 0.755 | 1.350 | ZINC1814239   | 1.068 | 0.777 | 1.203 | ZINC771868    | 1.027 | 0.849 | 1.202 |
| ZINC95099184  | 1.120 | 0.875 | 1.509 | ZINC4416340   | 1.067 | 0.831 | 1.490 | ZINC641059    | 1.026 | 0.752 | 1.206 |
| ZINC604403850 | 1.120 | 0.752 | 1.320 | ZINC524731545 | 1.067 | 0.781 | 1.276 | ZINC5126033   | 1.026 | 0.762 | 1.203 |
| ZINC272757    | 1.119 | 0.788 | 1.230 | ZINC789673    | 1.067 | 0.752 | 1.257 | ZINC34582172  | 1.025 | 0.792 | 1.401 |
| ZINC4416342   | 1.118 | 0.867 | 1.558 | ZINC35183154  | 1.067 | 0.864 | 1.220 | ZINC95909527  | 1.025 | 0.811 | 1.359 |
| ZINC832596    | 1.118 | 0.824 | 1.304 | ZINC4349347   | 1.066 | 0.835 | 1.523 | ZINC95910756  | 1.024 | 0.762 | 1.478 |
| ZINC79188978  | 1.118 | 0.816 | 1.228 | ZINC256004464 | 1.066 | 0.831 | 1.486 | ZINC4102355   | 1.024 | 0.809 | 1.459 |
| ZINC4136393   | 1.117 | 0.796 | 1.309 | ZINC9601620   | 1.066 | 0.754 | 1.256 | ZINC85489357  | 1.024 | 0.818 | 1.386 |
| ZINC985538    | 1.117 | 0.804 | 1.307 | ZINC188472    | 1.066 | 0.888 | 1.241 | ZINC59765534  | 1.023 | 0.817 | 1.442 |

|               |       |       |       |               |       |       |       |               |       |       |       |
|---------------|-------|-------|-------|---------------|-------|-------|-------|---------------|-------|-------|-------|
| ZINC4135564   | 1.116 | 0.774 | 1.312 | ZINC1807496   | 1.066 | 0.758 | 1.202 | ZINC39213584  | 1.023 | 0.808 | 1.419 |
| ZINC5126026   | 1.116 | 0.823 | 1.302 | ZINC59587489  | 1.065 | 0.832 | 1.546 | ZINC85531479  | 1.023 | 0.832 | 1.384 |
| ZINC4950181   | 1.116 | 0.825 | 1.301 | ZINC838172    | 1.065 | 0.821 | 1.257 | ZINC19624606  | 1.023 | 0.766 | 1.243 |
| ZINC5126016   | 1.116 | 0.822 | 1.301 | ZINC789678    | 1.065 | 0.751 | 1.255 | ZINC59767459  | 1.022 | 0.771 | 1.485 |
| ZINC263585280 | 1.116 | 0.840 | 1.296 | ZINC85592752  | 1.065 | 0.810 | 1.240 | ZINC59771840  | 1.022 | 0.814 | 1.447 |
| ZINC784692    | 1.116 | 0.754 | 1.256 | ZINC4349341   | 1.064 | 0.829 | 1.526 | ZINC14684626  | 1.022 | 0.789 | 1.440 |
| ZINC524732009 | 1.114 | 0.759 | 1.341 | ZINC33832036  | 1.064 | 0.852 | 1.436 | ZINC13756081  | 1.022 | 0.777 | 1.215 |
| ZINC891969    | 1.114 | 0.777 | 1.281 | ZINC8589992   | 1.064 | 0.767 | 1.275 | ZINC9781363   | 1.022 | 0.781 | 1.213 |
| ZINC35183146  | 1.114 | 0.898 | 1.253 | ZINC4785836   | 1.064 | 0.750 | 1.254 | ZINC12656812  | 1.022 | 0.755 | 1.200 |
| ZINC9601600   | 1.114 | 0.794 | 1.252 | ZINC976543    | 1.064 | 0.802 | 1.240 | ZINC31494764  | 1.020 | 0.808 | 1.469 |
| ZINC043090    | 1.113 | 0.763 | 1.224 | ZINC408712    | 1.064 | 0.896 | 1.200 | ZINC43465446  | 1.020 | 0.796 | 1.427 |
| ZINC629087    | 1.111 | 0.774 | 1.279 | ZINC59769582  | 1.063 | 0.830 | 1.543 | ZINC33831890  | 1.019 | 0.778 | 1.489 |
| ZINC637501    | 1.110 | 0.811 | 1.323 | ZINC85509222  | 1.063 | 0.804 | 1.513 | ZINC95914666  | 1.018 | 0.783 | 1.500 |
| ZINC780279    | 1.110 | 0.817 | 1.295 | ZINC145236354 | 1.063 | 0.829 | 1.482 | ZINC59588314  | 1.018 | 0.811 | 1.421 |
| ZINC12342456  | 1.110 | 0.773 | 1.277 | ZINC524731655 | 1.063 | 0.801 | 1.263 | ZINC15830180  | 1.018 | 0.759 | 1.261 |
| ZINC524732095 | 1.110 | 0.810 | 1.272 | ZINC4416344   | 1.062 | 0.801 | 1.513 | ZINC12660384  | 1.018 | 0.751 | 1.242 |
| ZINC84153777  | 1.109 | 0.845 | 1.610 | ZINC14684624  | 1.062 | 0.829 | 1.480 | ZINC107430606 | 1.018 | 0.751 | 1.219 |
| ZINC59764672  | 1.109 | 0.857 | 1.550 | ZINC31155769  | 1.062 | 0.840 | 1.426 | ZINC8434862   | 1.018 | 0.784 | 1.206 |
| ZINC14684625  | 1.109 | 0.858 | 1.549 | ZINC95486355  | 1.062 | 0.842 | 1.423 | ZINC95098946  | 1.017 | 0.794 | 1.502 |
| ZINC641063    | 1.109 | 0.772 | 1.276 | ZINC35623187  | 1.062 | 0.860 | 1.215 | ZINC526567    | 1.017 | 0.769 | 1.255 |
| ZINC85643658  | 1.108 | 0.846 | 1.561 | ZINC15657732  | 1.061 | 0.839 | 1.425 | ZINC22289134  | 1.016 | 0.760 | 1.235 |
| ZINC524731546 | 1.108 | 0.849 | 1.306 | ZINC678123    | 1.061 | 0.761 | 1.249 | ZINC839517    | 1.016 | 0.766 | 1.233 |
| ZINC824764557 | 1.106 | 0.763 | 1.387 | ZINC12342533  | 1.061 | 0.764 | 1.247 | ZINC59764696  | 1.015 | 0.808 | 1.456 |
| ZINC36367814  | 1.106 | 0.914 | 1.218 | ZINC85531795  | 1.060 | 0.800 | 1.511 | ZINC59586922  | 1.015 | 0.792 | 1.441 |
| ZINC35183249  | 1.106 | 0.914 | 1.218 | ZINC1071126   | 1.060 | 0.772 | 1.244 | ZINC20113041  | 1.015 | 0.773 | 1.249 |
| ZINC12427889  | 1.105 | 0.775 | 1.299 | ZINC12402879  | 1.060 | 0.798 | 1.236 | ZINC95912862  | 1.014 | 0.801 | 1.446 |
| ZINC192121    | 1.105 | 0.837 | 1.259 | ZINC5126032   | 1.060 | 0.815 | 1.231 | ZINC34356282  | 1.014 | 0.787 | 1.383 |
| ZINC20761678  | 1.105 | 0.755 | 1.216 | ZINC85540925  | 1.059 | 0.809 | 1.564 | ZINC101269056 | 1.014 | 0.754 | 1.304 |



|               |       |       |       |               |       |       |       |               |       |       |       |
|---------------|-------|-------|-------|---------------|-------|-------|-------|---------------|-------|-------|-------|
| ZINC70454948  | 1.104 | 0.843 | 1.602 | ZINC31156122  | 1.059 | 0.854 | 1.459 | ZINC15830202  | 1.014 | 0.757 | 1.257 |
| ZINC5166457   | 1.104 | 0.752 | 1.301 | ZINC59733192  | 1.059 | 0.839 | 1.439 | ZINC1322114   | 1.014 | 0.772 | 1.248 |
| ZINC1127263   | 1.104 | 0.767 | 1.271 | ZINC851296    | 1.059 | 0.763 | 1.271 | ZINC31156160  | 1.013 | 0.800 | 1.386 |
| ZINC637757    | 1.104 | 0.767 | 1.271 | ZINC9781365   | 1.059 | 0.816 | 1.250 | ZINC40395299  | 1.013 | 0.781 | 1.367 |
| ZINC524732094 | 1.104 | 0.763 | 1.271 | ZINC13403091  | 1.059 | 0.763 | 1.245 | ZINC839520    | 1.013 | 0.752 | 1.235 |
| ZINC32124293  | 1.104 | 0.771 | 1.215 | ZINC9782507   | 1.059 | 0.761 | 1.245 | ZINC5126043   | 1.013 | 0.752 | 1.213 |
| ZINC8846457   | 1.103 | 0.814 | 1.312 | ZINC4084083   | 1.059 | 0.774 | 1.218 | ZINC38139689  | 1.012 | 0.760 | 1.453 |
| ZINC13282202  | 1.102 | 0.766 | 1.269 | ZINC31158282  | 1.058 | 0.815 | 1.509 | ZINC604404017 | 1.012 | 0.756 | 1.322 |
| ZINC9601585   | 1.102 | 0.764 | 1.269 | ZINC85540917  | 1.057 | 0.814 | 1.531 | ZINC8964561   | 1.012 | 0.753 | 1.256 |
| ZINC189499    | 1.101 | 0.789 | 1.238 | ZINC136163915 | 1.057 | 0.822 | 1.478 | ZINC96115985  | 1.012 | 0.793 | 1.212 |
| ZINC69482277  | 1.100 | 0.826 | 1.377 | ZINC40412761  | 1.057 | 0.813 | 1.466 | ZINC95911739  | 1.011 | 0.778 | 1.408 |
| ZINC13739123  | 1.100 | 0.763 | 1.267 | ZINC12342497  | 1.057 | 0.796 | 1.232 | ZINC85877411  | 1.011 | 0.757 | 1.230 |
| ZINC1068770   | 1.100 | 0.763 | 1.267 | ZINC35880132  | 1.056 | 0.816 | 1.419 | ZINC59766885  | 1.010 | 0.777 | 1.407 |
| ZINC631628    | 1.100 | 0.783 | 1.264 | ZINC524729083 | 1.056 | 0.755 | 1.320 | ZINC15988049  | 1.010 | 0.766 | 1.223 |
| ZINC19851363  | 1.100 | 0.839 | 1.253 | ZINC882630    | 1.056 | 0.755 | 1.243 | ZINC59767653  | 1.009 | 0.785 | 1.415 |
| ZINC4692013   | 1.099 | 0.867 | 1.558 | ZINC9782503   | 1.056 | 0.761 | 1.242 | ZINC59767342  | 1.008 | 0.785 | 1.433 |
| ZINC14648312  | 1.099 | 0.759 | 1.407 | ZINC13282211  | 1.056 | 0.790 | 1.233 | ZINC59588414  | 1.008 | 0.783 | 1.374 |
| ZINC851295    | 1.099 | 0.762 | 1.266 | ZINC525915108 | 1.055 | 0.802 | 1.520 | ZINC31162312  | 1.008 | 0.773 | 1.345 |
| ZINC9601606   | 1.098 | 0.762 | 1.265 | ZINC85877634  | 1.055 | 0.770 | 1.213 | ZINC15674091  | 1.006 | 0.762 | 1.220 |
| ZINC789659    | 1.098 | 0.782 | 1.262 | ZINC101192117 | 1.055 | 0.789 | 1.209 | ZINC15830196  | 1.005 | 0.797 | 1.236 |
| ZINC14648310  | 1.097 | 0.758 | 1.405 | ZINC4012524   | 1.055 | 0.897 | 1.201 | ZINC95910262  | 1.004 | 0.790 | 1.416 |
| ZINC5642047   | 1.097 | 0.760 | 1.264 | ZINC33833250  | 1.054 | 0.830 | 1.523 | ZINC85511982  | 1.003 | 0.805 | 1.357 |
| ZINC9782399   | 1.096 | 0.824 | 1.299 | ZINC34013285  | 1.054 | 0.819 | 1.474 | ZINC95918982  | 1.003 | 0.756 | 1.307 |
| ZINC13510361  | 1.096 | 0.758 | 1.263 | ZINC2316884   | 1.054 | 0.794 | 1.230 | ZINC15120654  | 1.003 | 0.756 | 1.307 |
| ZINC086265    | 1.096 | 0.851 | 1.245 | ZINC59585959  | 1.053 | 0.792 | 1.528 | ZINC59765346  | 1.002 | 0.807 | 1.442 |
| ZINC272761    | 1.096 | 0.790 | 1.233 | ZINC1532699   | 1.053 | 0.766 | 1.411 | ZINC59181830  | 1.002 | 0.779 | 1.428 |
| ZINC9782477   | 1.095 | 0.767 | 1.288 | ZINC15657718  | 1.052 | 0.818 | 1.471 | ZINC824654903 | 1.002 | 0.765 | 1.212 |
| ZINC35183161  | 1.095 | 0.903 | 1.207 | ZINC5226172   | 1.052 | 0.790 | 1.275 | ZINC38469524  | 1.000 | 0.763 | 1.402 |

|              |       |       |       |              |       |       |       |              |       |       |       |
|--------------|-------|-------|-------|--------------|-------|-------|-------|--------------|-------|-------|-------|
| ZINC32124522 | 1.094 | 0.759 | 1.261 | ZINC19210502 | 1.052 | 0.793 | 1.273 | ZINC85645483 | 1.000 | 0.764 | 1.401 |
| ZINC6732641  | 1.094 | 0.756 | 1.261 |              |       |       |       |              |       |       |       |

**Table S4.** 2D structures of selected NPs and docking score values

| ID           | Structure                                                                           | CG4    | CG3:<br>Steric | CG3:<br>Clash | CG3:<br>ProDesov | CG3:<br>LigDesov | CG3:<br>LigDesovHB | CG4:<br>HB |
|--------------|-------------------------------------------------------------------------------------|--------|----------------|---------------|------------------|------------------|--------------------|------------|
| ZINC84153787 | 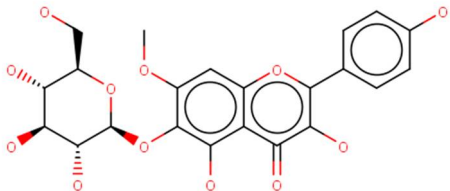   | -8.931 | -10.724        | 0.575         | 5.283            | 4.773            | -1.097             | -7.742     |
| ZINC33833997 |    | -8.354 | -9.435         | 0.439         | 4.085            | 3.750            | -0.956             | -6.237     |
| ZINC33833796 |  | -8.209 | -8.885         | 0.442         | 4.839            | 4.652            | -2.049             | -7.328     |

|              |                                                                                     |        |         |       |       |       |        |        |
|--------------|-------------------------------------------------------------------------------------|--------|---------|-------|-------|-------|--------|--------|
| ZINC8926342  | 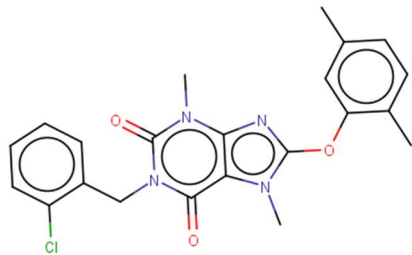   | -6.555 | -13.748 | 0.402 | 6.696 | 1.213 | -0.385 | -0.733 |
| ZINC12296449 |    | -6.354 | -12.324 | 0.630 | 7.377 | 4.811 | -2.615 | -4.234 |
| ZINC8606274  |   | -6.350 | -13.193 | 0.384 | 6.329 | 1.225 | -0.390 | -0.706 |
| ZINC9601609  |  | -6.208 | -13.566 | 0.459 | 6.864 | 1.239 | -0.430 | -0.776 |

ZINC8926323

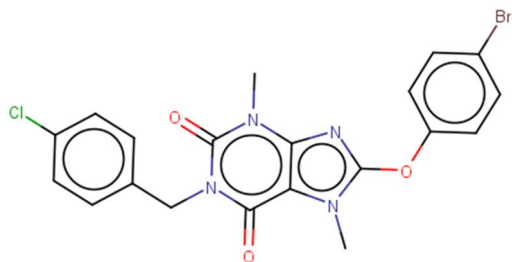

-6.177

-13.200

0.444

6.689

1.263

-0.487

-0.887

ZINC2488345

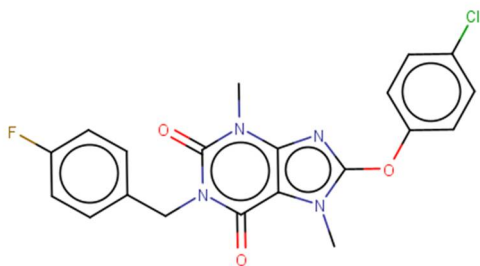

-6.005

-13.278

0.436

6.943

1.285

-0.485

-0.907

ZINC9601596

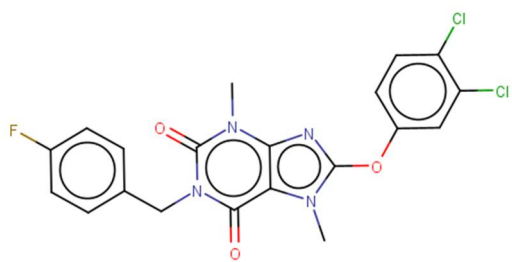

-5.765

-11.394

0.546

4.857

1.055

-0.245

-0.585

ZINC1094329

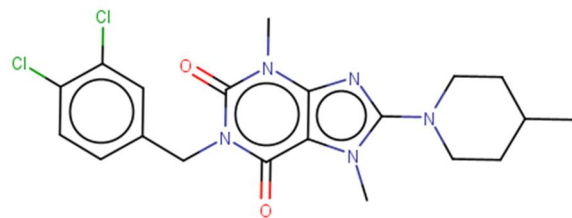

-5.719

-11.853

0.454

5.998

1.179

-0.661

-0.836

|             |                                                                                     |        |         |       |       |       |        |        |
|-------------|-------------------------------------------------------------------------------------|--------|---------|-------|-------|-------|--------|--------|
| ZINC8916385 | 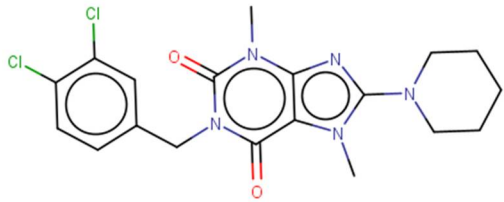   | -5.618 | -11.121 | 0.352 | 5.615 | 1.152 | -0.677 | -0.938 |
| ZINC640985  |    | -5.496 | -9.718  | 0.292 | 4.591 | 1.737 | -0.486 | -1.911 |
| ZINC832612  |    | -5.467 | -11.065 | 0.361 | 5.453 | 1.293 | -0.667 | -0.842 |
| ZINC2334127 |   | -5.462 | -11.049 | 0.383 | 5.695 | 0.976 | -0.589 | -0.878 |
| ZINC838204  |  | -5.433 | -9.915  | 0.692 | 3.922 | 3.320 | -1.734 | -1.718 |

|             |                                                                                     |        |         |       |       |       |        |        |
|-------------|-------------------------------------------------------------------------------------|--------|---------|-------|-------|-------|--------|--------|
| ZINC838200  | 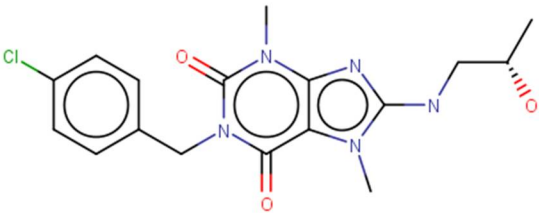   | -5.433 | -9.915  | 0.692 | 3.922 | 3.320 | -1.734 | -1.718 |
| ZINC9601608 |    | -5.428 | -10.591 | 0.379 | 5.135 | 1.091 | -0.678 | -0.764 |
| ZINC6732655 |   | -5.385 | -11.569 | 0.407 | 6.060 | 1.077 | -0.528 | -0.832 |
| ZINC838142  |  | -5.353 | -10.193 | 0.295 | 4.872 | 1.008 | -0.589 | -0.747 |

|             |                                                                                     |        |         |       |       |       |        |        |
|-------------|-------------------------------------------------------------------------------------|--------|---------|-------|-------|-------|--------|--------|
| ZINC1108640 | 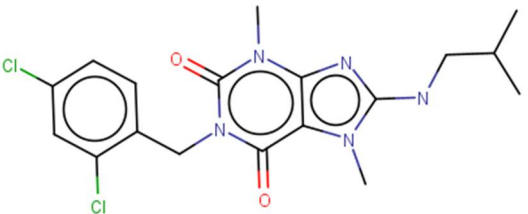   | -5.265 | -10.287 | 0.254 | 5.188 | 0.959 | -0.671 | -0.708 |
| ZINC2488364 |    | -5.058 | -9.481  | 0.648 | 3.946 | 3.487 | -1.764 | -1.894 |
| ZINC9601615 |   | -5.012 | -11.365 | 0.316 | 5.355 | 1.681 | -0.355 | -0.645 |
| ZINC4147162 |  | -4.938 | -10.745 | 0.357 | 5.175 | 1.453 | -0.427 | -0.752 |

|             |                                                                                     |        |         |       |       |       |        |        |
|-------------|-------------------------------------------------------------------------------------|--------|---------|-------|-------|-------|--------|--------|
| ZINC1094334 | 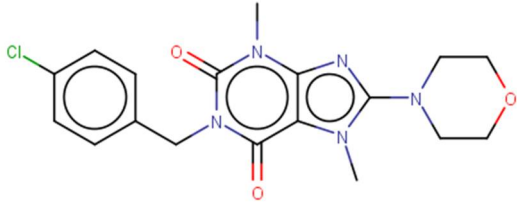   | -4.890 | -10.195 | 0.333 | 5.224 | 1.288 | -0.627 | -0.912 |
| ZINC2488384 |    | -4.883 | -11.425 | 0.611 | 4.753 | 3.251 | -1.085 | -0.988 |
| ZINC789645  |    | -4.880 | -10.261 | 0.360 | 5.359 | 1.236 | -0.713 | -0.860 |
| ZINC2488377 |   | -4.865 | -9.962  | 0.685 | 5.021 | 3.044 | -1.446 | -2.207 |
| ZINC8589983 |  | -4.776 | -11.736 | 0.487 | 5.829 | 2.207 | -1.103 | -0.460 |



|              |                                                                                     |         |         |       |       |       |        |        |
|--------------|-------------------------------------------------------------------------------------|---------|---------|-------|-------|-------|--------|--------|
| ZINC13512682 | 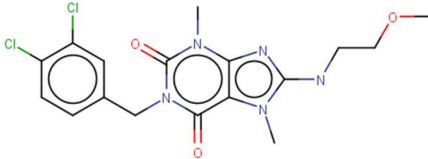   | -4.767  | -10.221 | 0.393 | 5.056 | 1.444 | -0.629 | -0.810 |
| ZINC13142224 |    | -4.745  | -10.847 | 0.375 | 4.950 | 1.948 | -0.600 | -0.571 |
| ZINC6565526  |    | -4.550  | -11.020 | 0.549 | 6.459 | 2.273 | -1.333 | -1.479 |
| Linagliptin  |  | -4.46   | -11.595 | 0.451 | 6.384 | 3.254 | -1.946 | -1.008 |
| ZINC2508009  |  | -10.551 | -13.226 | 0.282 | 4.557 | 2.848 | -1.197 | -3.815 |

|               |                                                                                     |        |         |       |       |       |        |        |
|---------------|-------------------------------------------------------------------------------------|--------|---------|-------|-------|-------|--------|--------|
| ZINC85879571  | 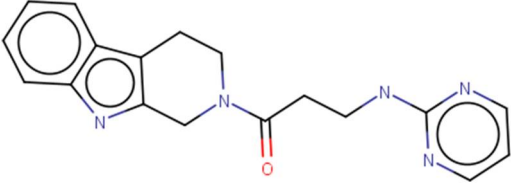   | -9.829 | -14.484 | 0.471 | 6.275 | 5.084 | -3.593 | -3.582 |
| ZINC11692316  |    | -9.682 | -13.000 | 0.703 | 7.300 | 4.382 | -3.422 | -5.645 |
| ZINC96112842  |    | -9.297 | -10.873 | 0.283 | 2.794 | 2.910 | -2.182 | -2.229 |
| ZINC604405970 |   | -9.149 | -15.395 | 0.497 | 7.919 | 1.802 | -1.899 | -2.073 |
| ZINC12296782  |  | -9.138 | -15.055 | 0.466 | 6.659 | 3.408 | -2.042 | -2.574 |

|               |                                                                                    |         |         |       |        |       |         |        |
|---------------|------------------------------------------------------------------------------------|---------|---------|-------|--------|-------|---------|--------|
| Sitagliptin   | 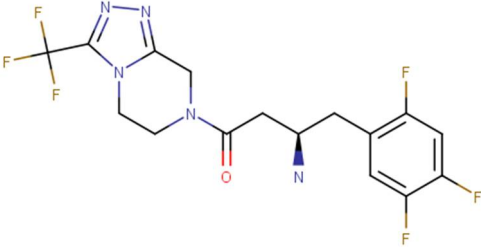  | -8.859  | -15.328 | 1.057 | 8.670  | 2.924 | -2.423  | -3.760 |
| ZINC15674091  |   | -11.613 | -15.359 | 0.639 | 4.5601 | 3.369 | -2.475  | -2.347 |
| ZINC524732009 |  | -11.498 | -16.260 | 0.385 | 6.205  | 2.612 | -0.5131 | -3.928 |

ZINC15830055

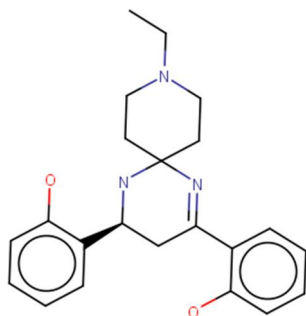

-11.158   -13.655   0.465   5.597   2.691   -3.077   -3.179

ZINC3984976

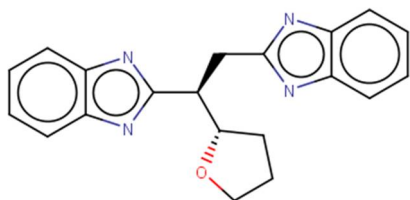

-11.003   -13.108   0.552   4.932   2.584   -3.215   -2.748

ZINC85509222

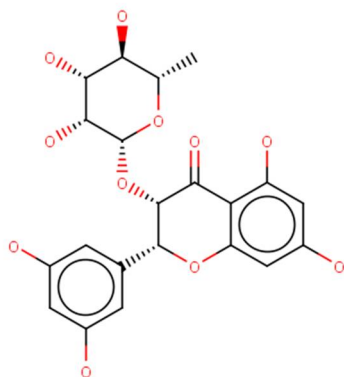

-10.850   -16.481   0.542   6.656   4.889   -1.320   -5.137

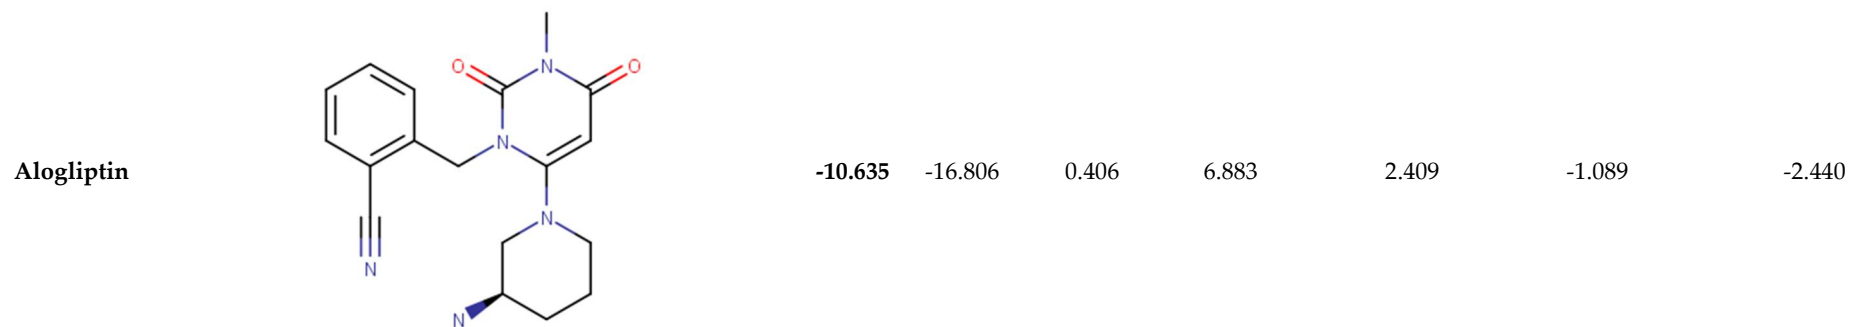

**Table S5.** Absorption parameters for selected NPs and drugs (pkCSM online tool was engaged)

| Molecule     | Water solubility<br>(log mol/L) | Caco2 permeability<br>(log cm/s)<br>high Caco2 permeability >0.9 | Human intestinal absorption<br>(% Absorbed)<br>poorly absorbed <30% | Skin Permeability<br>low skin permeability, log Kp>-2.5 | P-glycoprotein substrate | P-glycoprotein I inhibitor | P-glycoprotein II inhibitor |
|--------------|---------------------------------|------------------------------------------------------------------|---------------------------------------------------------------------|---------------------------------------------------------|--------------------------|----------------------------|-----------------------------|
| ZINC84153787 | -2.953                          | -0.829                                                           | 43.287                                                              | -2.735                                                  | Yes                      | No                         | No                          |
| ZINC33833997 | -2.907                          | -0.425                                                           | 26.427                                                              | -2.735                                                  | Yes                      | No                         | No                          |
| ZINC33833796 | -2.906                          | -0.453                                                           | 26.115                                                              | -2.735                                                  | Yes                      | No                         | No                          |
| ZINC8926342  | -2.979                          | 1.504                                                            | 94.892                                                              | -2.735                                                  | No                       | Yes                        | Yes                         |
| ZINC12296449 | -2.890                          | 0.964                                                            | 67.835                                                              | -2.735                                                  | Yes                      | No                         | No                          |
| ZINC8606274  | -3.044                          | 1.393                                                            | 92.916                                                              | -2.737                                                  | No                       | Yes                        | Yes                         |
| ZINC9601609  | -2.943                          | 1.473                                                            | 92.500                                                              | -2.735                                                  | Yes                      | Yes                        | Yes                         |
| ZINC8926323  | -3.063                          | 1.443                                                            | 93.155                                                              | -2.737                                                  | No                       | Yes                        | Yes                         |
| ZINC2488345  | -3.016                          | 1.333                                                            | 94.403                                                              | -2.736                                                  | No                       | Yes                        | Yes                         |
| ZINC9601596  | -3.024                          | 1.302                                                            | 94.011                                                              | -2.736                                                  | No                       | Yes                        | Yes                         |
| ZINC1094329  | -2.996                          | 1.502                                                            | 99.222                                                              | -2.777                                                  | Yes                      | Yes                        | No                          |

|               |        |       |         |        |     |     |     |
|---------------|--------|-------|---------|--------|-----|-----|-----|
| ZINC8916385   | -2.874 | 1.056 | 100.000 | -2.787 | Yes | No  | No  |
| ZINC640985    | -2.770 | 1.492 | 75.968  | -2.735 | No  | No  | No  |
| ZINC832612    | -2.733 | 1.023 | 100.000 | -2.788 | Yes | No  | No  |
| ZINC2334127   | -2.976 | 1.525 | 99.564  | -2.780 | No  | No  | No  |
| ZINC838204    | -2.659 | 0.679 | 72.249  | -2.735 | Yes | No  | No  |
| ZINC838200    | -2.912 | 0.049 | 72.588  | -2.735 | Yes | No  | No  |
| ZINC6732655   | -2.977 | 1.414 | 94.163  | -2.735 | Yes | Yes | No  |
| ZINC9601608   | -2.937 | 1.437 | 91.389  | -2.735 | No  | Yes | Yes |
| ZINC838142    | -2.923 | 1.502 | 100.000 | -2.755 | No  | No  | No  |
| ZINC1108640   | -3.074 | 1.475 | 92.427  | -2.735 | Yes | Yes | No  |
| ZINC2488364   | -2.875 | 1.403 | 77.058  | -2.735 | No  | No  | No  |
| ZINC9601615   | -2.981 | 1.357 | 96.997  | -2.735 | No  | No  | No  |
| ZINC4147162   | -2.981 | 1.413 | 95.045  | -2.735 | Yes | No  | No  |
| ZINC1094334   | -2.758 | 0.530 | 89.257  | -2.769 | No  | No  | No  |
| ZINC2488384   | -2.887 | 1.399 | 77.004  | -2.735 | No  | No  | No  |
| ZINC789645    | -2.692 | 1.452 | 100.000 | -2.778 | No  | No  | No  |
| ZINC2488377   | -2.949 | 1.378 | 71.507  | -2.735 | No  | No  | No  |
| ZINC8589983   | -3.054 | 1.370 | 93.475  | -2.737 | No  | Yes | Yes |
| ZINC13512682  | -2.872 | 1.401 | 97.236  | -2.735 | No  | No  | No  |
| ZINC13142224  | -2.887 | 0.278 | 83.907  | -2.735 | No  | No  | No  |
| ZINC6565526   | -2.924 | 1.544 | 93.399  | -2.747 | No  | No  | No  |
| Linagliptin   | -2.976 | 1.295 | 83.771  | -2.737 | Yes | Yes | No  |
| ZINC2508009   | -4.219 | 1.338 | 92.203  | -2.723 | Yes | Yes | Yes |
| ZINC85879571  | -4.046 | 0.952 | 93.871  | -3.069 | Yes | No  | No  |
| ZINC11692316  | -3.755 | 0.741 | 93.771  | -2.707 | Yes | No  | No  |
| ZINC96112842  | -2.567 | 0.485 | 87.431  | -2.774 | Yes | No  | No  |
| ZINC604405970 | -4.551 | 1.108 | 91.284  | -2.792 | Yes | Yes | Yes |
| ZINC12296782  | -3.905 | 0.746 | 97.117  | -3.000 | Yes | No  | No  |

|               |        |        |        |        |     |     |     |
|---------------|--------|--------|--------|--------|-----|-----|-----|
| Sitagliptin   | -4.159 | 1.331  | 90.851 | -2.950 | No  | No  | No  |
| ZINC15674091  | -3.458 | 0.814  | 89.606 | -2.738 | Yes | Yes | Yes |
| ZINC524732009 | -2.892 | 0.861  | 86.834 | -2.735 | Yes | No  | Yes |
| ZINC15830055  | -3.310 | 0.914  | 86.807 | -2.736 | Yes | Yes | Yes |
| ZINC3984976   | -2.892 | 0.858  | 78.915 | -2.735 | Yes | No  | No  |
| ZINC85509222  | -3.129 | -0.314 | 56.114 | -2.735 | Yes | No  | No  |
| Alogliptin    | -2.531 | 0.293  | 79.038 | -3.081 | No  | No  | No  |

**Table S6.** Distribution parameters parameters for selected NPs and drugs (pkCSM online tool was engaged)

| Molecule     | Human volume of distribution<br>(VDss) (log L/kg)<br>VDss low, logVDss<-0.15<br>VDss high, logVDss>0.45 | Human fraction unbound<br>(Fu) | BBB permeability<br>(log BB)<br>readily cross the BBB, logBB>0.3<br>poorly distributed, logBB<-1 | CNS permeability<br>(log PS)<br>to Penetrate the CNS, logPS>-2<br>unable to penetrate the CNS,<br>logPS<-3 |
|--------------|---------------------------------------------------------------------------------------------------------|--------------------------------|--------------------------------------------------------------------------------------------------|------------------------------------------------------------------------------------------------------------|
| ZINC84153787 | 0.817                                                                                                   | 0.137                          | -1.912                                                                                           | -4.447                                                                                                     |
| ZINC33833997 | 0.134                                                                                                   | 0.152                          | -1.464                                                                                           | -4.429                                                                                                     |
| ZINC33833796 | 0.116                                                                                                   | 0.145                          | -1.571                                                                                           | -4.455                                                                                                     |
| ZINC8926342  | 0.277                                                                                                   | 0.230                          | -1.128                                                                                           | -2.238                                                                                                     |
| ZINC12296449 | 0.326                                                                                                   | 0.372                          | -1.628                                                                                           | -2.908                                                                                                     |
| ZINC8606274  | -0.035                                                                                                  | 0.188                          | -1.085                                                                                           | -2.216                                                                                                     |
| ZINC9601609  | 0.092                                                                                                   | 0.240                          | -1.152                                                                                           | -2.184                                                                                                     |
| ZINC8926323  | 0.045                                                                                                   | 0.208                          | -1.105                                                                                           | -2.192                                                                                                     |
| ZINC2488345  | -0.102                                                                                                  | 0.247                          | -1.129                                                                                           | -2.403                                                                                                     |
| ZINC9601596  | -0.066                                                                                                  | 0.257                          | -1.302                                                                                           | -2.290                                                                                                     |
| ZINC1094329  | 0.488                                                                                                   | 0.321                          | 0.297                                                                                            | -2.865                                                                                                     |
| ZINC8916385  | 0.731                                                                                                   | 0.311                          | -0.008                                                                                           | -2.873                                                                                                     |

|               |        |       |        |        |
|---------------|--------|-------|--------|--------|
| ZINC640985    | 0.329  | 0.401 | -1.414 | -3.099 |
| ZINC832612    | 0.747  | 0.303 | 0.021  | -2.858 |
| ZINC2334127   | 0.507  | 0.317 | 0.344  | -2.857 |
| ZINC838204    | -0.410 | 0.409 | -1.449 | -3.488 |
| ZINC838200    | -0.285 | 0.276 | -1.360 | -3.034 |
| ZINC6732655   | 0.222  | 0.270 | -1.364 | -2.935 |
| ZINC9601608   | -0.042 | 0.263 | -1.375 | -2.498 |
| ZINC838142    | 0.353  | 0.387 | 0.100  | -2.921 |
| ZINC1108640   | 0.173  | 0.252 | -1.251 | -2.482 |
| ZINC2488364   | -0.023 | 0.324 | -1.386 | -3.071 |
| ZINC9601615   | 0.058  | 0.285 | -1.415 | -3.053 |
| ZINC4147162   | 0.239  | 0.253 | -1.197 | -2.922 |
| ZINC1094334   | 0.552  | 0.350 | -1.354 | -2.988 |
| ZINC2488384   | -0.015 | 0.322 | -1.395 | -3.069 |
| ZINC789645    | 0.580  | 0.370 | -0.207 | -2.918 |
| ZINC2488377   | 0.055  | 0.257 | -1.222 | -3.189 |
| ZINC8589983   | -0.009 | 0.181 | -1.092 | -2.211 |
| ZINC13512682  | -0.023 | 0.339 | -1.562 | -3.082 |
| ZINC13142224  | -0.074 | 0.337 | -1.454 | -3.151 |
| ZINC6565526   | 0.415  | 0.400 | -1.568 | -3.025 |
| Linagliptin   | 0.376  | 0.245 | -1.436 | -2.939 |
| ZINC2508009   | 0.752  | 0.000 | 0.043  | -1.942 |
| ZINC85879571  | 0.454  | 0.257 | -0.828 | -2.448 |
| ZINC11692316  | -0.167 | 0.110 | -0.538 | -2.295 |
| ZINC96112842  | -0.091 | 0.378 | -0.923 | -2.956 |
| ZINC604405970 | 0.875  | 0.161 | 0.273  | -1.758 |
| ZINC12296782  | 0.258  | 0.389 | -0.793 | -2.469 |
| Sitagliptin   | -0.314 | 0.294 | -1.523 | -3.115 |



|               |        |       |        |        |
|---------------|--------|-------|--------|--------|
| ZINC15674091  | 0.458  | 0.141 | -0.769 | -2.153 |
| ZINC524732009 | -0.018 | 0.308 | 0.145  | -1.947 |
| ZINC15830055  | 2.089  | 0.370 | -0.451 | -2.106 |
| ZINC3984976   | 0.657  | 0.224 | 0.388  | -2.077 |
| ZINC85509222  | 0.048  | 0.263 | -1.487 | -4.557 |
| Alogliptin    | 0.359  | 0.369 | -0.575 | -2.685 |

**Table S7.** Metabolism and excretion parameters for selected NPs and drugs (pkCSM online tool was engaged)

| Molecule     | CYP2D6<br>substrate | CYP3A4<br>substrate | CYP1A2<br>inhibitor | CYP2C19<br>inhibitor | CYP2C9<br>inhibitor | CYP2D6<br>inhibitor | CYP3A4<br>inhibitor | Total Clearance<br>(log ml/min/kg) | Renal<br>OCT2 sub-<br>strate |
|--------------|---------------------|---------------------|---------------------|----------------------|---------------------|---------------------|---------------------|------------------------------------|------------------------------|
| ZINC84153787 | No                  | No                  | No                  | No                   | No                  | No                  | No                  | 0.526                              | No                           |
| ZINC33833997 | No                  | No                  | No                  | No                   | No                  | No                  | No                  | 0.162                              | No                           |
| ZINC33833796 | No                  | No                  | No                  | No                   | No                  | No                  | No                  | 0.129                              | No                           |
| ZINC8926342  | No                  | No                  | Yes                 | Yes                  | Yes                 | No                  | Yes                 | 0.255                              | Yes                          |
| ZINC12296449 | No                  | No                  | No                  | No                   | No                  | No                  | No                  | 0.315                              | No                           |
| ZINC8606274  | No                  | Yes                 | Yes                 | Yes                  | Yes                 | No                  | Yes                 | 0.136                              | Yes                          |
| ZINC9601609  | No                  | No                  | Yes                 | Yes                  | Yes                 | No                  | Yes                 | 0.201                              | Yes                          |
| ZINC8926323  | No                  | Yes                 | Yes                 | Yes                  | Yes                 | No                  | Yes                 | 0.243                              | Yes                          |
| ZINC2488345  | No                  | Yes                 | Yes                 | Yes                  | Yes                 | No                  | Yes                 | 0.226                              | Yes                          |
| ZINC9601596  | No                  | Yes                 | Yes                 | Yes                  | Yes                 | No                  | Yes                 | 0.262                              | Yes                          |
| ZINC1094329  | No                  | Yes                 | No                  | Yes                  | No                  | No                  | No                  | 0.370                              | Yes                          |
| ZINC8916385  | No                  | Yes                 | Yes                 | Yes                  | No                  | No                  | No                  | 0.484                              | No                           |
| ZINC640985   | No                  | No                  | Yes                 | No                   | No                  | No                  | No                  | 0.342                              | No                           |
| ZINC832612   | No                  | Yes                 | Yes                 | Yes                  | No                  | No                  | No                  | 0.334                              | No                           |
| ZINC2334127  | No                  | Yes                 | Yes                 | Yes                  | No                  | No                  | No                  | 0.318                              | Yes                          |

|               |     |     |     |     |     |     |     |       |     |
|---------------|-----|-----|-----|-----|-----|-----|-----|-------|-----|
| ZINC838204    | No  | 0.390 | No  |
| ZINC838200    | No  | No  | Yes | No  | No  | No  | No  | 0.450 | Yes |
| ZINC6732655   | No  | No  | Yes | Yes | Yes | No  | No  | 0.572 | Yes |
| ZINC9601608   | No  | No  | Yes | Yes | Yes | No  | Yes | 0.182 | Yes |
| ZINC838142    | No  | Yes | Yes | Yes | No  | No  | No  | 0.301 | Yes |
| ZINC1108640   | No  | No  | Yes | Yes | Yes | No  | No  | 0.169 | Yes |
| ZINC2488364   | No  | No  | Yes | No  | No  | No  | No  | 0.444 | No  |
| ZINC9601615   | No  | 0.414 | No  |
| ZINC4147162   | No  | Yes | Yes | No  | Yes | No  | No  | 0.423 | Yes |
| ZINC1094334   | No  | Yes | Yes | Yes | No  | No  | No  | 0.433 | No  |
| ZINC2488384   | No  | No  | Yes | No  | No  | No  | No  | 0.382 | No  |
| ZINC789645    | No  | Yes | Yes | Yes | No  | No  | No  | 0.415 | No  |
| ZINC2488377   | No  | No  | Yes | No  | No  | No  | No  | 0.538 | Yes |
| ZINC8589983   | No  | Yes | Yes | Yes | Yes | No  | Yes | 0.172 | Yes |
| ZINC13512682  | No  | 0.531 | No  |
| ZINC13142224  | No  | 0.566 | No  |
| ZINC6565526   | No  | Yes | Yes | No  | No  | No  | No  | 0.318 | No  |
| Linagliptin   | No  | Yes | No  | No  | Yes | No  | Yes | 0.443 | Yes |
| ZINC2508009   | No  | Yes | Yes | Yes | No  | Yes | No  | 0.974 | No  |
| ZINC85879571  | No  | Yes | Yes | No  | No  | No  | No  | 0.730 | No  |
| ZINC11692316  | No  | Yes | Yes | No  | No  | No  | No  | 0.813 | No  |
| ZINC96112842  | No  | 0.799 | Yes |
| ZINC604405970 | Yes | Yes | Yes | Yes | Yes | Yes | No  | 0.981 | Yes |
| ZINC12296782  | Yes | Yes | Yes | No  | No  | No  | No  | 0.619 | No  |
| Sitagliptin   | No  | Yes | No  | No  | No  | No  | No  | 0.472 | No  |
| ZINC15674091  | No  | Yes | Yes | Yes | No  | Yes | Yes | 0.783 | Yes |
| ZINC524732009 | No  | No  | Yes | Yes | Yes | Yes | Yes | 0.486 | Yes |
| ZINC15830055  | Yes | Yes | No  | No  | No  | Yes | No  | 0.505 | No  |

|              |    |     |     |     |    |     |     |        |     |
|--------------|----|-----|-----|-----|----|-----|-----|--------|-----|
| ZINC3984976  | No | No  | Yes | Yes | No | Yes | Yes | 1.450  | Yes |
| ZINC85509222 | No | No  | No  | No  | No | No  | No  | -0.074 | No  |
| Alogliptin   | No | Yes | No  | No  | No | No  | No  | 0.365  | No  |

**Table S8.** Toxicity parameters for selected NPs and drugs (pkCSM online tool was engaged)

| Molecule     | AMES toxicity <sup>a</sup> | Max. Human tolerated Dose <sup>b</sup> (log mg/kg/day)<br>Toxic effect > 0.477<br>log mg/kg/day | hERG I inhibitor <sup>c</sup> | hERG II inhibitor <sup>d</sup> | Oral Rat Acute Toxicity <sup>e</sup> (LD50) (mol/kg) | Oral Rat Chronic Toxicity <sup>f</sup> (LOAEL) (log mg/kg_bw/day) | Hepatotoxicity <sup>g</sup> | Skin Sensitization <sup>h</sup> | T.Pyiformis toxicity <sup>i</sup> (log ug/L) | Minnow toxicity <sup>j</sup> (log mM) |
|--------------|----------------------------|-------------------------------------------------------------------------------------------------|-------------------------------|--------------------------------|------------------------------------------------------|-------------------------------------------------------------------|-----------------------------|---------------------------------|----------------------------------------------|---------------------------------------|
| ZINC84153787 | No                         | 0.639                                                                                           | No                            | Yes                            | 2.618                                                | 5.028                                                             | No                          | No                              | 0.285                                        | 4.394                                 |
| ZINC33833997 | No                         | 0.635                                                                                           | No                            | No                             | 2.694                                                | 5.224                                                             | No                          | No                              | 0.285                                        | 1.501                                 |
| ZINC33833796 | No                         | 0.646                                                                                           | No                            | No                             | 2.701                                                | 5.173                                                             | No                          | No                              | 0.285                                        | 1.532                                 |
| ZINC8926342  | Yes                        | 0.685                                                                                           | No                            | Yes                            | 2.720                                                | 1.249                                                             | No                          | No                              | 0.285                                        | 0.273                                 |
| ZINC12296449 | No                         | 0.526                                                                                           | No                            | No                             | 2.483                                                | 1.240                                                             | No                          | No                              | 0.285                                        | 0.209                                 |
| ZINC8606274  | No                         | 0.241                                                                                           | No                            | Yes                            | 2.647                                                | 0.855                                                             | No                          | No                              | 0.285                                        | -0.041                                |
| ZINC9601609  | Yes                        | 0.456                                                                                           | No                            | Yes                            | 2.678                                                | 1.008                                                             | No                          | No                              | 0.285                                        | -0.488                                |
| ZINC8926323  | No                         | 0.277                                                                                           | No                            | Yes                            | 2.652                                                | 0.847                                                             | No                          | No                              | 0.285                                        | -0.164                                |
| ZINC2488345  | No                         | 0.151                                                                                           | No                            | Yes                            | 2.632                                                | 1.013                                                             | No                          | No                              | 0.285                                        | 0.661                                 |
| ZINC9601596  | No                         | 0.239                                                                                           | No                            | Yes                            | 2.771                                                | 0.838                                                             | No                          | No                              | 0.285                                        | -0.235                                |
| ZINC1094329  | No                         | 0.832                                                                                           | No                            | Yes                            | 2.505                                                | 1.073                                                             | Yes                         | No                              | 0.285                                        | 0.174                                 |
| ZINC8916385  | Yes                        | -0.091                                                                                          | No                            | Yes                            | 2.820                                                | 1.028                                                             | Yes                         | No                              | 0.286                                        | -0.173                                |
| ZINC640985   | Yes                        | 1.249                                                                                           | No                            | No                             | 2.236                                                | 1.132                                                             | Yes                         | No                              | 0.285                                        | 2.361                                 |
| ZINC832612   | Yes                        | -0.121                                                                                          | No                            | Yes                            | 2.764                                                | 1.074                                                             | Yes                         | No                              | 0.286                                        | 0.152                                 |
| ZINC2334127  | No                         | 0.830                                                                                           | No                            | Yes                            | 2.435                                                | 1.105                                                             | Yes                         | No                              | 0.285                                        | 0.937                                 |

|               |     |        |    |     |       |       |     |    |       |        |
|---------------|-----|--------|----|-----|-------|-------|-----|----|-------|--------|
| ZINC838204    | Yes | 0.766  | No | No  | 2.285 | 1.773 | Yes | No | 0.285 | 3.741  |
| ZINC838200    | Yes | 0.770  | No | Yes | 1.986 | 1.047 | Yes | No | 0.285 | 2.940  |
| ZINC6732655   | Yes | 0.801  | No | Yes | 2.695 | 1.012 | Yes | No | 0.285 | 1.492  |
| ZINC9601608   | Yes | 0.393  | No | Yes | 2.571 | 1.023 | No  | No | 0.285 | -0.547 |
| ZINC838142    | Yes | 0.627  | No | Yes | 2.402 | 1.207 | Yes | No | 0.285 | 1.612  |
| ZINC1108640   | Yes | 0.781  | No | Yes | 2.719 | 1.038 | Yes | No | 0.285 | 1.918  |
| ZINC2488364   | Yes | 0.773  | No | No  | 2.321 | 0.975 | Yes | No | 0.285 | 2.122  |
| ZINC9601615   | Yes | 0.809  | No | Yes | 2.420 | 0.988 | Yes | No | 0.285 | 1.895  |
| ZINC4147162   | Yes | 0.783  | No | Yes | 2.625 | 1.047 | Yes | No | 0.285 | 1.817  |
| ZINC1094334   | Yes | 0.110  | No | Yes | 2.566 | 1.083 | Yes | No | 0.285 | 0.499  |
| ZINC2488384   | Yes | 0.774  | No | No  | 2.325 | 0.975 | Yes | No | 0.285 | 1.976  |
| ZINC789645    | Yes | -0.139 | No | Yes | 2.745 | 1.167 | Yes | No | 0.286 | 1.317  |
| ZINC2488377   | Yes | 0.790  | No | Yes | 2.354 | 1.016 | Yes | No | 0.285 | 2.853  |
| ZINC8589983   | Yes | 0.312  | No | Yes | 2.782 | 0.856 | No  | No | 0.285 | -0.581 |
| ZINC13512682  | Yes | 0.785  | No | No  | 2.374 | 0.940 | Yes | No | 0.285 | 1.651  |
| ZINC13142224  | Yes | 0.727  | No | No  | 2.368 | 1.119 | Yes | No | 0.285 | 2.701  |
| ZINC6565526   | No  | 0.107  | No | Yes | 2.661 | 1.116 | Yes | No | 0.285 | 0.336  |
| Linagliptin   | Yes | 0.722  | No | Yes | 2.677 | 1.264 | Yes | No | 0.285 | 0.670  |
| ZINC2508009   | Yes | 0.323  | No | Yes | 2.105 | 0.835 | Yes | No | 0.753 | -0.049 |
| ZINC85879571  | No  | -0.410 | No | Yes | 2.285 | 1.618 | Yes | No | 0.521 | 0.325  |
| ZINC11692316  | No  | -0.355 | No | Yes | 2.300 | 1.998 | Yes | No | 0.321 | 2.118  |
| ZINC96112842  | Yes | 0.248  | No | Yes | 2.611 | 1.424 | Yes | No | 0.285 | 1.864  |
| ZINC604405970 | No  | -0.688 | No | Yes | 2.568 | 1.026 | Yes | No | 1.100 | -0.491 |
| ZINC12296782  | No  | -0.409 | No | Yes | 2.223 | 1.157 | Yes | No | 0.324 | 2.605  |
| Sitagliptin   | No  | 0.570  | No | No  | 2.496 | 1.145 | Yes | No | 0.350 | 0.672  |
| ZINC15674091  | Yes | 0.024  | No | Yes | 3.205 | 1.350 | Yes | No | 0.285 | -0.404 |
| ZINC524732009 | Yes | 0.316  | No | Yes | 2.484 | 0.601 | No  | No | 0.285 | 2.451  |
| ZINC15830055  | No  | -0.434 | No | Yes | 3.313 | 1.330 | Yes | No | 0.291 | 3.747  |

|              |     |        |     |     |       |       |     |    |       |       |
|--------------|-----|--------|-----|-----|-------|-------|-----|----|-------|-------|
| ZINC3984976  | Yes | 0.434  | Yes | Yes | 2.396 | 1.859 | No  | No | 0.285 | 1.344 |
| ZINC85509222 | Yes | 0.827  | No  | No  | 2.781 | 3.865 | No  | No | 0.285 | 2.605 |
| Alogliptin   | Yes | -0.685 | No  | Yes | 2.385 | 1.428 | Yes | No | 0.789 | 2.671 |

<sup>a</sup>A compound with a positive values of AMES mutagenicity test is mutagenic and therefore may act as a carcinogen; <sup>b</sup>A Maximum recommended tolerated dose (MRTD) is  $\leq 0.477 \log \text{mg/kg/day}$  is considered to be low, while  $> 0.477 \log \text{mg/kg/day}$  is considered to be high; A hERG <sup>c</sup>I/<sup>d</sup>II inhibitors could cause the development of the acquired long QT syndrome, which leads to fatal ventricular arrhythmia; <sup>e</sup>A lethal dosage value LD50 (mol/kg) is consider a standard measurement of acute toxicity; <sup>f</sup>The lowest dose of a compound that results in an observed adverse effect (LOAEL) is in  $\log (\text{mg/kg}_{\text{bw}}/\text{day})$ ; <sup>g</sup>A compound with positive tests could be associated with disrupted normal function of the liver; <sup>h</sup>A compound with positive tests could have a high potential adverse effect for products applied to the skin, e.g. cosmetics and antifungals; <sup>i</sup>A value  $> -0.5 \log \mu\text{g/L}$  is considered to be toxic; <sup>j</sup>A  $\log \text{LC50}$  values  $< -0.3$  indicate high acute toxicity.

**Table S9.** Docked interaction analysis of selected NPs compounds with target proteins 2RGU and 2ONC

| Molecule     | Bonds length<br>(Å) | Type                       | Category                    | Active site residues | NP:Atoms         |
|--------------|---------------------|----------------------------|-----------------------------|----------------------|------------------|
| ZINC12296449 | 3.173               | Salt Bridge                | Hydrogen Bond;Electrostatic | A:ARG669:NH2         | ZINC12296449:O26 |
|              | 4.145               | Attractive Charge          | Electrostatic               | A:ARG358:NH1         | ZINC12296449:O26 |
|              | 2.604               | Conventional Hydrogen Bond | Hydrogen Bond               | A:ARG358:NH1         | ZINC12296449:O29 |
|              | 2.686               | Conventional Hydrogen Bond | Hydrogen Bond               | A:SER630:OG          | ZINC12296449:O28 |
|              | 3.711               | Carbon Hydrogen Bond       | Hydrogen Bond               | A:GLU205:OE2         | ZINC12296449:C18 |
|              | 3.655               | Carbon Hydrogen Bond       | Hydrogen Bond               | A:GLU206:OE2         | ZINC12296449:C18 |
|              | 3.594               | Carbon Hydrogen Bond       | Hydrogen Bond               | A:ASN710:OD1         | ZINC12296449:C18 |
|              | 3.179               | Carbon Hydrogen Bond       | Hydrogen Bond               | A:GLU205:O           | ZINC12296449:C20 |
|              | 3.924               | Pi-Sigma                   | Hydrophobic                 | A:PHE357             | ZINC12296449:C17 |
|              | 5.020               | Pi-Pi Stacked              | Hydrophobic                 | A:TYR666             | ZINC12296449     |
|              | 5.261               | Pi-Pi Stacked              | Hydrophobic                 | A:TYR666             | ZINC12296449     |
|              | 4.725               | Pi-Pi Stacked              | Hydrophobic                 | A:PHE357             | ZINC12296449     |
|              | 4.603               | Pi-Pi T-shaped             | Hydrophobic                 | A:TYR547             | ZINC12296449     |

|             |       |                                                |               |              |                  |
|-------------|-------|------------------------------------------------|---------------|--------------|------------------|
|             | 3.922 | Pi-Alkyl                                       | Hydrophobic   | A:TYR547     | ZINC12296449     |
|             | 4.268 | Pi-Alkyl                                       | Hydrophobic   | A:TYR662     | ZINC12296449:C18 |
| ZINC8926342 | 3.383 | Water Hydrogen Bond;<br>Pi-Donor Hydrogen Bond | Hydrogen Bond | A:HOH1041:O  | ZINC8926342      |
|             | 3.204 | Conventional Hydrogen Bond                     | Hydrogen Bond | A:TYR631:N   | ZINC8926342:O27  |
|             | 3.606 | Carbon Hydrogen Bond                           | Hydrogen Bond | A:SER630:OG  | ZINC8926342:C20  |
|             | 3.639 | Pi-Anion                                       | Electrostatic | A:GLU206:OE1 | ZINC8926342      |
|             | 2.895 | Pi-Donor Hydrogen Bond                         | Hydrogen Bond | A:TYR547:OH  | ZINC8926342      |
|             | 3.460 | Pi-Donor Hydrogen Bond                         | Hydrogen Bond | A:TYR547:OH  | ZINC8926342      |
|             | 3.878 | Pi-Sigma                                       | Hydrophobic   | A:PHE357     | ZINC8926342:C18  |
|             | 3.614 | Pi-Pi Stacked                                  | Hydrophobic   | A:TYR547     | ZINC8926342      |
|             | 4.617 | Pi-Pi Stacked                                  | Hydrophobic   | A:TRP629     | ZINC8926342      |
|             | 5.625 | Pi-Pi Stacked                                  | Hydrophobic   | A:TRP629     | ZINC8926342      |
|             | 4.431 | Pi-Pi Stacked                                  | Hydrophobic   | A:TYR547     | ZINC8926342      |
|             | 5.211 | Pi-Alkyl                                       | Hydrophobic   | A:TYR547     | ZINC8926342:C20  |
|             | 5.089 | Pi-Alkyl                                       | Hydrophobic   | A:TYR547     | ZINC8926342:C21  |
|             | 5.481 | Pi-Alkyl                                       | Hydrophobic   | A:TYR631     | ZINC8926342:C20  |
| ZINC8606274 | 3.893 | Water Hydrogen Bond;<br>Pi-Donor Hydrogen Bond | Hydrogen Bond | A:HOH1020:O  | ZINC08606274     |
|             | 3.200 | Water Hydrogen Bond;<br>Pi-Donor Hydrogen Bond | Hydrogen Bond | A:HOH1041:O  | ZINC08606274     |
|             | 3.224 | Conventional Hydrogen Bond                     | Hydrogen Bond | A:TYR631:N   | ZINC08606274:O25 |
|             | 3.266 | Carbon Hydrogen Bond                           | Hydrogen Bond | A:SER630:OG  | ZINC08606274:C18 |
|             | 3.469 | Pi-Anion                                       | Electrostatic | A:GLU206:OE1 | ZINC08606274     |
|             | 3.540 | Pi-Donor Hydrogen Bond                         | Hydrogen Bond | A:TYR547:OH  | ZINC08606274     |
|             | 3.407 | Pi-Donor Hydrogen Bond                         | Hydrogen Bond | A:TYR547:OH  | ZINC08606274     |
|             | 3.969 | Pi-Sigma                                       | Hydrophobic   | A:TRP629:CB  | ZINC08606274     |

|             |       |                                                |               |              |                   |
|-------------|-------|------------------------------------------------|---------------|--------------|-------------------|
|             | 3.802 | Pi-Pi Stacked                                  | Hydrophobic   | A:TYR547     | ZINC08606274      |
|             | 4.870 | Pi-Pi Stacked                                  | Hydrophobic   | A:TYR547     | ZINC08606274      |
|             | 3.715 | Pi-Alkyl                                       | Hydrophobic   | A:TRP629     | ZINC08606274:CI28 |
|             | 3.544 | Pi-Alkyl                                       | Hydrophobic   | A:TRP629     | ZINC08606274:CI28 |
| ZINC9601609 | 4.020 | Water Hydrogen Bond;<br>Pi-Donor Hydrogen Bond | Hydrogen Bond | A:HOH1020:O  | ZINC9601609       |
|             | 3.262 | Water Hydrogen Bond;<br>Pi-Donor Hydrogen Bond | Hydrogen Bond | A:HOH1041:O  | ZINC9601609       |
|             | 3.133 | Conventional Hydrogen Bond                     | Hydrogen Bond | A:TYR631:N   | ZINC9601609:O26   |
|             | 3.328 | Carbon Hydrogen Bond                           | Hydrogen Bond | A:SER630:OG  | ZINC9601609:C19   |
|             | 3.624 | Pi-Anion                                       | Electrostatic | A:GLU206:OE1 | ZINC9601609       |
|             | 3.433 | Pi-Donor Hydrogen Bond                         | Hydrogen Bond | A:TYR547:OH  | ZINC9601609       |
|             | 3.292 | Pi-Donor Hydrogen Bond                         | Hydrogen Bond | A:TYR547:OH  | ZINC9601609       |
|             | 3.728 | Pi-Pi Stacked                                  | Hydrophobic   | A:TYR547     | ZINC9601609       |
|             | 4.828 | Pi-Pi Stacked                                  | Hydrophobic   | A:TYR547     | ZINC9601609       |
|             | 3.656 | Pi-Alkyl                                       | Hydrophobic   | A:PHE357     | ZINC9601609:C18   |
|             | 5.239 | Pi-Alkyl                                       | Hydrophobic   | A:TYR547     | ZINC9601609:C20   |
|             | 3.866 | Pi-Alkyl                                       | Hydrophobic   | A:TRP629     | ZINC9601609:CI29  |
|             | 3.701 | Pi-Alkyl                                       | Hydrophobic   | A:TRP629     | ZINC9601609:CI29  |
|             | 4.261 | Pi-Alkyl                                       | Hydrophobic   | A:TYR666     | ZINC9601609:C18   |
| ZINC8926323 |       | Water Hydrogen Bond;<br>Pi-Donor Hydrogen Bond | Hydrogen Bond | A:HOH1041:O  | ZINC8926323       |
|             | 3.094 | Pi-Donor Hydrogen Bond                         |               |              |                   |
|             | 3.053 | Conventional Hydrogen Bond                     | Hydrogen Bond | A:TYR631:N   | ZINC8926323:O25   |
|             | 2.894 | Carbon Hydrogen Bond                           | Hydrogen Bond | A:SER630:CB  | ZINC8926323:O25   |
|             | 3.072 | Carbon Hydrogen Bond                           | Hydrogen Bond | A:SER630:OG  | ZINC8926323:C18   |
|             | 3.713 | Pi-Anion                                       | Electrostatic | A:GLU206:OE1 | ZINC8926323       |
|             | 3.662 | Pi-Donor Hydrogen Bond                         | Hydrogen Bond | A:TYR547:OH  | ZINC8926323       |

|             |       |                                                |               |              |                  |
|-------------|-------|------------------------------------------------|---------------|--------------|------------------|
|             | 3.311 | Pi-Donor Hydrogen Bond                         | Hydrogen Bond | A:TYR547:OH  | ZINC8926323      |
|             | 3.816 | Pi-Pi Stacked                                  | Hydrophobic   | A:TYR547     | ZINC8926323      |
|             | 4.707 | Pi-Pi Stacked                                  | Hydrophobic   | A:TYR547     | ZINC8926323      |
|             | 4.961 | Pi-Alkyl                                       | Hydrophobic   | A:PHE357     | ZINC8926323:Br29 |
|             | 5.138 | Pi-Alkyl                                       | Hydrophobic   | A:TYR547     | ZINC8926323:C19  |
|             | 3.911 | Pi-Alkyl                                       | Hydrophobic   | A:TRP629     | ZINC8926323:Cl28 |
|             | 3.605 | Pi-Alkyl                                       | Hydrophobic   | A:TRP629     | ZINC8926323:Cl28 |
|             | 4.002 | Water Hydrogen Bond;<br>Pi-Donor Hydrogen Bond | Hydrogen Bond | A:HOH1020:O  | ZINC2488345      |
|             | 3.056 | Water Hydrogen Bond;<br>Pi-Donor Hydrogen Bond | Hydrogen Bond | A:HOH1041:O  | ZINC2488345      |
|             | 2.969 | Conventional Hydrogen Bond                     | Hydrogen Bond | A:TYR631:N   | ZINC2488345:O25  |
|             | 3.171 | Carbon Hydrogen Bond                           | Hydrogen Bond | A:SER630:OG  | ZINC2488345:C18  |
|             | 3.372 | Pi-Anion                                       | Electrostatic | A:GLU206:OE1 | ZINC2488345      |
| ZINC2488345 | 3.543 | Pi-Donor Hydrogen Bond                         | Hydrogen Bond | A:TYR547:OH  | ZINC2488345      |
|             | 3.526 | Pi-Donor Hydrogen Bond                         | Hydrogen Bond | A:TYR547:OH  | ZINC2488345      |
|             | 3.868 | Pi-Sigma                                       | Hydrophobic   | A:TRP629:CB  | ZINC2488345      |
|             | 3.877 | Pi-Pi Stacked                                  | Hydrophobic   | A:TYR547     | ZINC2488345      |
|             | 5.026 | Pi-Pi Stacked                                  | Hydrophobic   | A:TYR547     | ZINC2488345      |
|             | 5.150 | Alkyl                                          | Hydrophobic   | A:356901     | ZINC2488345:C18  |
|             | 3.794 | Alkyl                                          | Hydrophobic   | A:356901     | ZINC2488345:Cl29 |
|             | 5.314 | Pi-Alkyl                                       | Hydrophobic   | A:TYR547     | ZINC2488345:C19  |
|             | 3.746 | Water Hydrogen Bond;<br>Pi-Donor Hydrogen Bond | Hydrogen Bond | A:HOH1041:O  | ZINC9601596      |
| ZINC9601596 | 3.708 | Water Hydrogen Bond;<br>Pi-Donor Hydrogen Bond | Hydrogen Bond | A:HOH1041:O  | ZINC9601596      |
|             | 3.220 | Water Hydrogen Bond;                           | Hydrogen Bond | A:HOH1020:O  | ZINC9601596:C20  |



|             |       |                                                |               |              |                  |
|-------------|-------|------------------------------------------------|---------------|--------------|------------------|
| <hr/>       |       |                                                |               |              |                  |
| ZINC9601596 | 3.639 | Carbon Hydrogen Bond                           | Hydrogen Bond | A:SER630:CB  | ZINC9601596:O25  |
|             | 2.887 | Halogen (Cl, Br, I)                            | Halogen       | A:GLU206:OE1 | ZINC9601596:Cl30 |
|             | 2.716 | Pi-Donor Hydrogen Bond                         | Hydrogen Bond | A:TYR547:OH  | ZINC9601596      |
|             | 4.006 | Pi-Pi Stacked                                  | Hydrophobic   | A:PHE357     | ZINC9601596      |
|             | 3.641 | Pi-Pi Stacked                                  | Hydrophobic   | A:TYR547     | ZINC9601596      |
|             | 4.394 | Pi-Pi Stacked                                  | Hydrophobic   | A:TRP629     | ZINC9601596      |
|             | 5.166 | Pi-Pi Stacked                                  | Hydrophobic   | A:TRP629     | ZINC9601596      |
|             | 3.748 | Pi-Pi Stacked                                  | Hydrophobic   | A:TYR547     | ZINC9601596      |
|             | 3.853 | Pi-Alkyl                                       | Hydrophobic   | A:PHE357     | ZINC9601596:Cl29 |
|             | 4.132 | Pi-Alkyl                                       | Hydrophobic   | A:TYR547     | ZINC9601596:C18  |
|             | 5.310 | Pi-Alkyl                                       | Hydrophobic   | A:TYR547     | ZINC9601596:C19  |
|             | 5.390 | Pi-Alkyl                                       | Hydrophobic   | A:TYR631     | ZINC9601596:C18  |
|             | <hr/> |                                                |               |              |                  |
| ZINC9601608 | 3.925 | Water Hydrogen Bond;<br>Pi-Donor Hydrogen Bond | Hydrogen Bond | A:HOH1020:O  | ZINC9601608      |
|             | 3.246 | Water Hydrogen Bond;<br>Pi-Donor Hydrogen Bond | Hydrogen Bond | A:HOH1041:O  | ZINC9601608      |
|             | 3.950 | Water Hydrogen Bond;<br>Pi-Donor Hydrogen Bond | Hydrogen Bond | A:HOH1041:O  | ZINC9601608      |
|             | 2.919 | Conventional Hydrogen Bond                     | Hydrogen Bond | A:TYR631:N   | ZINC9601608:O27  |
|             | 2.958 | Carbon Hydrogen Bond                           | Hydrogen Bond | A:SER630:CB  | ZINC9601608:O27  |
|             | 3.337 | Carbon Hydrogen Bond                           | Hydrogen Bond | A:SER630:OG  | ZINC9601608:C19  |
|             | 3.154 | Pi-Donor Hydrogen Bond                         | Hydrogen Bond | A:TYR547:OH  | ZINC9601608      |
|             | 3.570 | Pi-Pi Stacked                                  | Hydrophobic   | A:TYR547     | ZINC9601608      |
|             | 4.566 | Pi-Pi Stacked                                  | Hydrophobic   | A:TYR547     | ZINC9601608      |
|             | 4.954 | Pi-Pi T-shaped                                 | Hydrophobic   | A:PHE357     | ZINC9601608      |
|             | 5.402 | Pi-Alkyl                                       | Hydrophobic   | A:TYR547     | ZINC9601608:C18  |
| <hr/>       |       |                                                |               |              |                  |

|             |       |                                                    |               |              |                  |
|-------------|-------|----------------------------------------------------|---------------|--------------|------------------|
|             | 5.051 | Pi-Alkyl                                           | Hydrophobic   | A:TYR547     | ZINC9601608:C19  |
|             | 4.237 | Pi-Alkyl                                           | Hydrophobic   | A:TRP629     | ZINC9601608:CI30 |
|             | 3.985 | Pi-Alkyl                                           | Hydrophobic   | A:TRP629     | ZINC9601608:CI30 |
| ZINC8589983 | 3.074 | Water Hydrogen Bond;<br>Pi-Donor Hydrogen Bond     | Hydrogen Bond | A:HOH1041:O  | ZINC8589983      |
|             | 3.589 | Carbon Hydrogen Bond                               | Hydrogen Bond | A:SER630:OG  | ZINC8589983:C19  |
|             | 4.908 | Pi-Anion                                           | Electrostatic | A:GLU206:OE1 | ZINC8589983      |
|             | 2.790 | Pi-Donor Hydrogen Bond                             | Hydrogen Bond | A:TYR547:OH  | ZINC8589983      |
|             | 4.306 | Pi-Pi Stacked                                      | Hydrophobic   | A:TYR547     | ZINC8589983      |
|             | 4.665 | Pi-Pi Stacked                                      | Hydrophobic   | A:TRP629     | ZINC8589983      |
|             | 5.733 | Pi-Pi Stacked                                      | Hydrophobic   | A:TRP629     | ZINC8589983      |
|             | 3.646 | Pi-Pi Stacked                                      | Hydrophobic   | A:TYR547     | ZINC8589983      |
|             | 3.596 | Pi-Alkyl                                           | Hydrophobic   | A:PHE357     | ZINC8589983:CI29 |
|             | 3.979 | Pi-Alkyl                                           | Hydrophobic   | A:TYR547     | ZINC8589983:C18  |
|             | 5.445 | Pi-Alkyl                                           | Hydrophobic   | A:TYR631     | ZINC8589983:C19  |
| Linagliptin | 2.969 | Water Hydrogen Bond;<br>Conventional Hydrogen Bond | Hydrogen Bond | A:HOH1020:O  | A:356901:N25     |
|             | 3.227 | Water Hydrogen Bond;<br>Pi-Donor Hydrogen Bond     | Hydrogen Bond | A:HOH1041:O  | A:356901         |
|             | 2.911 | Water Hydrogen Bond;<br>Conventional Hydrogen Bond | Hydrogen Bond | A:HOH1041:O  | A:356901:N24     |
|             | 3.053 | Conventional Hydrogen Bond                         | Hydrogen Bond | A:TYR631:N   | A:356901:O10     |
|             | 3.141 | Conventional Hydrogen Bond                         | Hydrogen Bond | A:TYR662:OH  | A:356901:N27     |
|             | 2.972 | Conventional Hydrogen Bond                         | Hydrogen Bond | A:GLU205:OE2 | A:356901:N27     |
|             | 2.712 | Conventional Hydrogen Bond                         | Hydrogen Bond | A:GLU206:OE1 | A:356901:N27     |
|             | 3.779 | Carbon Hydrogen Bond                               | Hydrogen Bond | A:SER630:CB  | A:356901:N24     |
|             | 3.672 | Carbon Hydrogen Bond                               | Hydrogen Bond | A:TYR666:OH  | A:356901:C6      |

|               |       |                            |               |               |                   |
|---------------|-------|----------------------------|---------------|---------------|-------------------|
|               | 2.973 | Pi-Donor Hydrogen Bond     | Hydrogen Bond | A:TYR547:OH   | A:356901          |
|               | 3.501 | Pi-Donor Hydrogen Bond     | Hydrogen Bond | A:TYR547:OH   | A:356901          |
|               | 3.660 | Pi-Pi Stacked              | Hydrophobic   | A:TYR547      | A:356901          |
|               | 4.560 | Pi-Pi Stacked              | Hydrophobic   | A:TRP629      | A:356901          |
|               | 3.653 | Pi-Pi Stacked              | Hydrophobic   | A:TRP629      | A:356901          |
|               | 5.673 | Pi-Pi Stacked              | Hydrophobic   | A:TRP629      | A:356901          |
|               | 4.390 | Pi-Pi Stacked              | Hydrophobic   | A:TRP629      | A:356901          |
|               | 4.585 | Pi-Pi Stacked              | Hydrophobic   | A:TYR547      | A:356901          |
|               | 4.964 | Alkyl                      | Hydrophobic   | A:VAL656      | A:356901:C23      |
|               | 4.537 | Alkyl                      | Hydrophobic   | A:VAL711      | A:356901:C23      |
|               | 5.146 | Pi-Alkyl                   | Hydrophobic   | A:PHE357      | A:356901          |
|               | 5.181 | Pi-Alkyl                   | Hydrophobic   | A:TYR547      | A:356901:C14      |
|               | 5.346 | Pi-Alkyl                   | Hydrophobic   | A:TRP627      | A:356901:C32      |
|               | 5.275 | Pi-Alkyl                   | Hydrophobic   | A:TRP629      | A:356901:C32      |
|               | 4.049 | Pi-Alkyl                   | Hydrophobic   | A:TYR662      | A:356901:C23      |
|               | 5.221 | Pi-Alkyl                   | Hydrophobic   | A:TYR666      | A:356901          |
|               | 2.687 | Conventional Hydrogen Bond | Hydrogen Bond | A:ARG125:HH22 | ZINC524732009:O26 |
|               | 2.393 | Conventional Hydrogen Bond | Hydrogen Bond | A:GLU205:O    | ZINC524732009:O28 |
|               | 2.154 | Conventional Hydrogen Bond | Hydrogen Bond | A:GLU206:OE1  | ZINC524732009:O28 |
|               | 2.526 | Carbon Hydrogen Bond       | Hydrogen Bond | A:GLU206:HA   | ZINC524732009:O28 |
|               | 3.860 | Pi-Pi Stacked              | Hydrophobic   | A:TYR547      | ZINC524732009     |
| ZINC524732009 | 4.228 | Pi-Pi Stacked              | Hydrophobic   | A:TYR662      | ZINC524732009     |
|               | 4.716 | Pi-Pi Stacked              | Hydrophobic   | A:TYR547      | ZINC524732009     |
|               | 4.735 | Pi-Pi T-shaped             | Hydrophobic   | A:TYR666      | ZINC524732009     |
|               | 5.713 | Pi-Pi T-shaped             | Hydrophobic   | A:TYR666      | ZINC524732009     |
|               | 5.431 | Pi-Pi T-shaped             | Hydrophobic   | A:TYR666      | ZINC524732009     |
|               | 5.466 | Pi-Alkyl                   | Hydrophobic   | A:VAL656      | ZINC524732009     |

|             |       |                                              |               |                       |                 |
|-------------|-------|----------------------------------------------|---------------|-----------------------|-----------------|
| ZINC3984976 | 3.131 | Conventional Hydrogen Bond                   | Hydrogen Bond | A:GLU206:OE1          | ZINC3984976:N23 |
|             | 3.895 | Pi-Pi Stacked                                | Hydrophobic   | A:PHE357              | ZINC3984976     |
|             | 4.617 | Pi-Pi Stacked                                | Hydrophobic   | A:TYR662              | ZINC3984976     |
|             | 4.612 | Pi-Pi Stacked                                | Hydrophobic   | A:PHE357              | ZINC3984976     |
|             | 5.484 | Pi-Pi Stacked                                | Hydrophobic   | A:TYR662              | ZINC3984976     |
|             | 4.413 | Pi-Pi T-shaped                               | Hydrophobic   | A:TYR666              | ZINC3984976     |
|             | 4.008 | Amide-Pi Stacked                             | Hydrophobic   | A:SER630:C,O;TYR631:N | ZINC3984976     |
|             | 4.616 | Pi-Alkyl                                     | Hydrophobic   | A:TYR547              | ZINC3984976     |
|             | 5.269 | Pi-Alkyl                                     | Hydrophobic   | A:VAL656              | ZINC3984976     |
| Alogliptin  | 3.771 | Water Hydrogen Bond;<br>Carbon Hydrogen Bond | Hydrogen Bond | A:HOH939:O            | A:SY1800:C2     |
|             | 2.950 | Conventional Hydrogen Bond                   | Hydrogen Bond | A:ARG125:HH22         | A:SY1800:N27    |
|             | 2.074 | Conventional Hydrogen Bond                   | Hydrogen Bond | A:TYR631:HN           | A:SY1800:O17    |
|             | 3.108 | Conventional Hydrogen Bond                   | Hydrogen Bond | A:GLU205:O            | A:SY1800:N1     |
|             | 2.555 | Conventional Hydrogen Bond                   | Hydrogen Bond | A:GLU205:OE1          | A:SY1800:N1     |
|             | 3.385 | Conventional Hydrogen Bond                   | Hydrogen Bond | A:GLU206:OE1          | A:SY1800:N1     |
|             | 2.362 | Carbon Hydrogen Bond                         | Hydrogen Bond | A:SER630:HB1          | A:SY1800:O17    |
|             | 3.715 | Carbon Hydrogen Bond                         | Hydrogen Bond | A:TYR547:OH           | A:SY1800:C5     |
|             | 4.395 | Pi-Pi Stacked                                | Hydrophobic   | A:TYR547              | A:SY1800        |
|             | 4.115 | Pi-Pi Stacked                                | Hydrophobic   | A:TYR547              | A:SY1800        |
|             | 4.503 | Pi-Pi Stacked                                | Hydrophobic   | A:TYR662              | A:SY1800        |
|             | 4.864 | Pi-Pi T-shaped                               | Hydrophobic   | A:TYR666              | A:SY1800        |
|             | 5.415 | Pi-Alkyl                                     | Hydrophobic   | A:PHE357              | A:SY1800        |

Table S10. The CSM values for the docked pose of each NPs

| NPs ID      | Type symmetry | Values      | Direction vector [x,y,z]                                         | Dipole Moments<br>(Debye)                           |
|-------------|---------------|-------------|------------------------------------------------------------------|-----------------------------------------------------|
| ZINC8926342 | C2 SYM        | 21.11271189 | [-0.9621419316919941, 0.2028967417687959, -0.1819775136097998]   | X= -5.2740<br>Y= 3.0649<br>Z= 0.7447<br>Tot= 6.1452 |
|             | C3 SYM        | 21.4116737  | [-0.9623080524897467, 0.2030447363354845, -0.18093105637188037]  |                                                     |
|             | C4 SYM        | 21.66063869 | [-0.9621970639867214, 0.20510821059158382, -0.1791854681698597]  |                                                     |
|             | C5 SYM        | 21.66063869 | [-0.9621970639867214, 0.20510821059158366, -0.17918546816985975] |                                                     |
|             | C6 SYM        | 21.66063869 | [-0.9621970639867212, 0.2051082105915841, -0.17918546816986]     |                                                     |
|             | C7 SYM        | 21.66063869 | [-0.9621970639867214, 0.20510821059158355, -0.1791854681698596]  |                                                     |
|             | C8 SYM        | 21.66063869 | [-0.9621970639867214, 0.20510821059158343, -0.17918546816985942] |                                                     |
|             | C9 SYM        | 21.66063869 | [-0.9621970639867214, 0.20510821059158366, -0.1791854681698598]  |                                                     |
|             | C10 SYM       | 21.66063869 | [-0.9621970639867214, 0.20510821059158377, -0.17918546816985956] |                                                     |
|             | C11 SYM       | 21.66063869 | [-0.9621970639867214, 0.2051082105915837, -0.17918546816985959]  |                                                     |
|             | C12 SYM       | 21.66063869 | [-0.9621970639867214, 0.2051082105915835, -0.17918546816985972]  |                                                     |
|             | C13 SYM       | 21.66063869 | [-0.9621970639867212, 0.20510821059158413, -0.17918546816986028] |                                                     |
|             | C14 SYM       | 21.66063869 | [-0.9621970639867212, 0.2051082105915843, -0.17918546816986014]  |                                                     |
|             | C15 SYM       | 21.66063869 | [-0.9621970639867214, 0.20510821059158404, -0.17918546816985972] |                                                     |
|             | C16 SYM       | 21.66063869 | [-0.9621970639867212, 0.20510821059158396, -0.1791854681698597]  |                                                     |
|             | C17 SYM       | 21.66063869 | [-0.9621970639867214, 0.20510821059158382, -0.17918546816985953] |                                                     |
|             | C18 SYM       | 21.66063869 | [-0.9621970639867214, 0.20510821059158388, -0.17918546816985956] |                                                     |
|             | C19 SYM       | 21.66063869 | [-0.9621970639867214, 0.20510821059158355, -0.17918546816985953] |                                                     |
|             | C20 SYM       | 21.66063869 | [-0.9621970639867214, 0.20510821059158418, -0.17918546816985964] |                                                     |
|             | S4 SYM        | 99.46065105 | [0.37945566860260754, -0.8204492363656322, -0.4276405571416246]  |                                                     |
|             | S6 SYM        | 99.46065105 | [0.37945566860260677, -0.8204492363656322, -0.4276405571416255]  |                                                     |
|             | S8 SYM        | 99.46065105 | [0.37945566860260677, -0.8204492363656323, -0.42764055714162524] |                                                     |
|             | S10 SYM       | 99.46065105 | [0.3794556686026063, -0.8204492363656325, -0.4276405571416252]   |                                                     |
|             | S12 SYM       | 99.46065105 | [0.3794556686026072, -0.820449236365632, -0.42764055714162535]   |                                                     |

|              |                |             |                                                                  |              |
|--------------|----------------|-------------|------------------------------------------------------------------|--------------|
| ZINC12296449 | S14 SYM        | 99.46065105 | [0.3794556686026084, -0.8204492363656319, -0.4276405571416247]   |              |
|              | S16 SYM        | 99.46065105 | [0.37945566860260677, -0.8204492363656324, -0.42764055714162497] |              |
|              | S18 SYM        | 99.46065105 | [0.37945566860261015, -0.8204492363656313, -0.42764055714162436] |              |
|              | S20 SYM        | 99.46065105 | [0.3794556686026077, -0.8204492363656318, -0.4276405571416255]   |              |
|              | INVERSION (S2) | 99.34013556 | [1.0, 0.0, 0.0]                                                  |              |
|              | MIRROR SYM     | 9.639780275 | [0.214151606138893, 0.9749743963583917, -0.05969938051372397]    |              |
|              | C2 SYM         | 24.04982074 | [-0.891813636670858, 0.3630308795631635, -0.26995743725908866]   |              |
|              | C3 SYM         | 26.89315539 | [0.890827664172849, -0.35944343086564795, 0.27789655044976386]   |              |
|              | C4 SYM         | 26.91219867 | [0.8910768739290744, -0.36007857396721515, 0.2762705654218802]   |              |
|              | C5 SYM         | 26.91219867 | [0.8910768739290746, -0.3600785739672146, 0.2762705654218802]    |              |
|              | C6 SYM         | 26.91219867 | [0.8910768739290746, -0.3600785739672145, 0.27627056542188017]   |              |
|              | C7 SYM         | 26.91219867 | [0.8910768739290744, -0.3600785739672148, 0.2762705654218801]    |              |
|              | C8 SYM         | 26.91219867 | [0.8910768739290746, -0.36007857396721443, 0.27627056542188]     |              |
|              | C9 SYM         | 26.91219867 | [0.8910768739290746, -0.36007857396721454, 0.27627056542188005]  |              |
|              | C10 SYM        | 26.91219867 | [0.8910768739290743, -0.360078573967215, 0.2762705654218804]     |              |
|              | C11 SYM        | 26.91219867 | [0.8910768739290746, -0.3600785739672146, 0.27627056542188033]   | X= 17.9660   |
|              | C12 SYM        | 26.91219867 | [0.8910768739290748, -0.36007857396721443, 0.27627056542187994]  | Y= -5.9141   |
|              | C13 SYM        | 26.91219867 | [0.8910768739290746, -0.36007857396721443, 0.2762705654218802]   | Z= 4.1409    |
|              | C14 SYM        | 26.91219867 | [0.8910768739290742, -0.3600785739672153, 0.2762705654218802]    | Tot= 19.3624 |
|              | C15 SYM        | 26.91219867 | [0.8910768739290744, -0.36007857396721493, 0.27627056542188055]  |              |
|              | C16 SYM        | 26.91219867 | [0.8910768739290746, -0.3600785739672143, 0.27627056542187994]   |              |
|              | C17 SYM        | 26.91219867 | [0.8910768739290749, -0.3600785739672142, 0.27627056542187944]   |              |
|              | C18 SYM        | 26.91219867 | [0.8910768739290749, -0.36007857396721415, 0.27627056542188005]  |              |
|              | C19 SYM        | 26.91219867 | [0.8910768739290746, -0.3600785739672145, 0.2762705654218801]    |              |
|              | C20 SYM        | 26.91219867 | [0.8910768739290746, -0.36007857396721443, 0.27627056542188033]  |              |
|              | S4 SYM         | 97.55050953 | [-0.21189487460407433, -0.748928206261235, -0.6278591434253805]  |              |
|              | S6 SYM         | 97.55050953 | [-0.21189487460407427, -0.7489282062612354, -0.6278591434253801] |              |
|              | S8 SYM         | 97.55050953 | [-0.21189487460407436, -0.7489282062612352, -0.6278591434253803] |              |

|             |                |             |                                                                  |             |
|-------------|----------------|-------------|------------------------------------------------------------------|-------------|
| ZINC8606274 | S10 SYM        | 97.55050953 | [-0.21189487460407444, -0.7489282062612346, -0.6278591434253813] |             |
|             | S12 SYM        | 97.55050953 | [-0.21189487460407433, -0.7489282062612355, -0.6278591434253803] |             |
|             | S14 SYM        | 97.55050953 | [-0.21189487460407433, -0.7489282062612348, -0.6278591434253809] |             |
|             | S16 SYM        | 97.55050953 | [-0.21189487460407444, -0.7489282062612347, -0.627859143425381]  |             |
|             | S18 SYM        | 97.55050953 | [-0.21189487460407436, -0.7489282062612355, -0.6278591434253801] |             |
|             | S20 SYM        | 97.55050953 | [-0.211894874604074, -0.7489282062612357, -0.6278591434253799]   |             |
|             | INVERSION (S2) | 97.05581945 | [1.0, 0.0, 0.0]                                                  |             |
|             | MIRROR SYM     | 5.215307877 | [-0.43042319165417453, -0.8627491251147063, 0.2653296500582674]  |             |
|             | C2 SYM         | 19.39617505 | [-0.9503036781036427, 0.27956330355388814, -0.1369937176980213]  |             |
|             | C3 SYM         | 22.02279929 | [-0.9534629741308476, 0.26796563736266765, -0.13821278578473958] |             |
|             | C4 SYM         | 22.02279929 | [-0.9534629741308476, 0.2679656373626675, -0.13821278578473958]  |             |
|             | C5 SYM         | 22.02279929 | [-0.9534629741308476, 0.26796563736266754, -0.13821278578473964] |             |
|             | C6 SYM         | 22.02279929 | [-0.9534629741308476, 0.26796563736266726, -0.13821278578473967] |             |
|             | C7 SYM         | 22.02279929 | [-0.9534629741308476, 0.26796563736266743, -0.13821278578473967] |             |
|             | C8 SYM         | 22.02279929 | [-0.9534629741308474, 0.2679656373626681, -0.13821278578473972]  |             |
|             | C9 SYM         | 22.02279929 | [-0.9534629741308474, 0.26796563736266815, -0.1382127857847399]  |             |
|             | C10 SYM        | 22.02279929 | [-0.9534629741308474, 0.2679656373626679, -0.13821278578473986]  | X= -6.4873  |
|             | C11 SYM        | 22.02279929 | [-0.9534629741308476, 0.2679656373626672, -0.13821278578473936]  | Y= 2.2160   |
|             | C12 SYM        | 22.02279929 | [-0.9534629741308474, 0.26796563736266793, -0.1382127857847398]  | Z= 0.5607   |
|             | C13 SYM        | 22.02279929 | [-0.9534629741308474, 0.2679656373626679, -0.13821278578473972]  | Tot= 6.8783 |
|             | C14 SYM        | 22.02279929 | [-0.9534629741308474, 0.2679656373626677, -0.13821278578473975]  |             |
|             | C15 SYM        | 22.02279929 | [-0.9534629741308474, 0.26796563736266804, -0.13821278578473975] |             |
|             | C16 SYM        | 22.02279929 | [-0.9534629741308476, 0.26796563736266743, -0.13821278578473964] |             |
|             | C17 SYM        | 22.02279929 | [-0.9534629741308474, 0.2679656373626679, -0.1382127857847398]   |             |
|             | C18 SYM        | 22.02279929 | [-0.9534629741308474, 0.2679656373626679, -0.13821278578473997]  |             |
|             | C19 SYM        | 22.02279929 | [-0.9534629741308476, 0.26796563736266765, -0.1382127857847393]  |             |
|             | C20 SYM        | 22.02279929 | [-0.9534629741308474, 0.26796563736266815, -0.13821278578474]    |             |
|             | S4 SYM         | 97.30740442 | [0.40383698403762247, 0.8926133509272338, 0.20039235531789157]   |             |

|             |                |             |                                                                  |             |
|-------------|----------------|-------------|------------------------------------------------------------------|-------------|
| ZINC9601609 | S6 SYM         | 97.30740442 | [0.4038369840376223, 0.892613350927234, 0.20039235531789143]     |             |
|             | S8 SYM         | 97.30740442 | [0.4038369840376225, 0.8926133509272342, 0.20039235531789135]    |             |
|             | S10 SYM        | 97.30740442 | [0.4038369840376226, 0.8926133509272338, 0.2003923553178915]     |             |
|             | S12 SYM        | 97.30740442 | [0.4038369840376227, 0.8926133509272339, 0.20039235531789112]    |             |
|             | S14 SYM        | 97.30740442 | [0.40383698403762236, 0.8926133509272338, 0.2003923553178915]    |             |
|             | S16 SYM        | 97.30740442 | [0.40383698403762286, 0.8926133509272335, 0.20039235531789182]   |             |
|             | S18 SYM        | 97.30740442 | [0.4038369840376226, 0.8926133509272336, 0.2003923553178919]     |             |
|             | S20 SYM        | 97.30740442 | [0.4038369840376223, 0.8926133509272338, 0.20039235531789126]    |             |
|             | INVERSION (S2) | 97.08902452 | [1.0, 0.0, 0.0]                                                  |             |
|             | MIRROR SYM     | 5.984689927 | [-0.2565112496026603, -0.9523797561467064, -0.16484774462886068] |             |
|             | C2 SYM         | 19.91691427 | [-0.9694718791805164, 0.16614609674205455, -0.18033233214146102] |             |
|             | C3 SYM         | 21.78860077 | [-0.9707484935460979, 0.1814910707749704, -0.15718891025430567]  |             |
|             | C4 SYM         | 21.78860077 | [-0.9707484935460979, 0.18149107077497037, -0.1571889102543056]  |             |
|             | C5 SYM         | 21.78860077 | [-0.9707484935460979, 0.18149107077497045, -0.15718891025430554] |             |
|             | C6 SYM         | 21.78860077 | [-0.9707484935460979, 0.18149107077497073, -0.15718891025430576] |             |
|             | C7 SYM         | 21.78860077 | [-0.9707484935460979, 0.18149107077497037, -0.15718891025430573] |             |
|             | C8 SYM         | 21.78860077 | [-0.9707484935460979, 0.18149107077497048, -0.1571889102543056]  |             |
|             | C9 SYM         | 21.78860077 | [-0.9707484935460979, 0.18149107077497081, -0.15718891025430584] | X= -4.7122  |
|             | C10 SYM        | 21.78860077 | [-0.9707484935460982, 0.1814910707749703, -0.15718891025430545]  | Y= -0.3364  |
|             | C11 SYM        | 21.78860077 | [-0.9707484935460982, 0.1814910707749704, -0.15718891025430556]  | Z= 0.8994   |
|             | C12 SYM        | 21.78860077 | [-0.9707484935460979, 0.18149107077497073, -0.1571889102543057]  | Tot= 4.8090 |
|             | C13 SYM        | 21.78860077 | [-0.9707484935460979, 0.1814910707749707, -0.15718891025430556]  |             |
|             | C14 SYM        | 21.78860077 | [-0.9707484935460979, 0.1814910707749704, -0.15718891025430573]  |             |
|             | C15 SYM        | 21.78860077 | [-0.9707484935460979, 0.1814910707749706, -0.1571889102543058]   |             |
|             | C16 SYM        | 21.78860077 | [-0.9707484935460979, 0.18149107077497056, -0.15718891025430567] |             |
|             | C17 SYM        | 21.78860077 | [-0.9707484935460979, 0.1814910707749705, -0.15718891025430534]  |             |
|             | C18 SYM        | 21.78860077 | [-0.9707484935460979, 0.1814910707749706, -0.1571889102543053]   |             |
|             | C19 SYM        | 21.78860077 | [-0.9707484935460979, 0.18149107077497045, -0.15718891025430587] |             |



|             |                |             |                                                                  |             |
|-------------|----------------|-------------|------------------------------------------------------------------|-------------|
| ZINC8926323 | C20 SYM        | 21.78860077 | [-0.9707484935460979, 0.18149107077497068, -0.15718891025430584] |             |
|             | S4 SYM         | 97.40199476 | [-0.47410089626313306, 0.5588695819241383, 0.6803624993798768]   |             |
|             | S6 SYM         | 97.40199476 | [-0.4741008962631332, 0.5588695819241379, 0.6803624993798769]    |             |
|             | S8 SYM         | 97.40199476 | [-0.47410089626313306, 0.558869581924138, 0.6803624993798769]    |             |
|             | S10 SYM        | 97.40199476 | [-0.47410089626313295, 0.5588695819241382, 0.6803624993798769]   |             |
|             | S12 SYM        | 97.40199476 | [-0.4741008962631335, 0.5588695819241383, 0.6803624993798766]    |             |
|             | S14 SYM        | 97.40199476 | [-0.47410089626313306, 0.5588695819241384, 0.6803624993798768]   |             |
|             | S16 SYM        | 97.40199476 | [-0.4741008962631334, 0.5588695819241382, 0.6803624993798768]    |             |
|             | S18 SYM        | 97.40199476 | [-0.4741008962631334, 0.5588695819241379, 0.6803624993798768]    |             |
|             | S20 SYM        | 97.40199476 | [-0.47410089626313295, 0.5588695819241379, 0.6803624993798771]   |             |
|             | INVERSION (S2) | 97.19949866 | [1.0, 0.0, 0.0]                                                  |             |
|             | MIRROR SYM     | 8.505728756 | [-0.03218284228812027, -0.8152987047035999, -0.5781455584633427] |             |
|             | C2 SYM         | 17.7775725  | [-0.975794584243115, 0.14289788980486193, -0.16554492577884672]  |             |
|             | C3 SYM         | 21.75997913 | [-0.979551005929775, 0.14437960491038287, -0.1401226479477456]   |             |
|             | C4 SYM         | 21.75997913 | [-0.979551005929775, 0.1443796049103828, -0.14012264794774548]   |             |
|             | C5 SYM         | 21.75997913 | [-0.979551005929775, 0.14437960491038274, -0.1401226479477456]   |             |
|             | C6 SYM         | 21.75997913 | [-0.979551005929775, 0.14437960491038287, -0.14012264794774548]  |             |
|             | C7 SYM         | 21.75997913 | [-0.979551005929775, 0.14437960491038282, -0.14012264794774554]  |             |
|             | C8 SYM         | 21.75997913 | [-0.979551005929775, 0.14437960491038285, -0.14012264794774554]  | X= -4.3286  |
|             | C9 SYM         | 21.75997913 | [-0.979551005929775, 0.14437960491038304, -0.14012264794774565]  | Y= -0.7382  |
|             | C10 SYM        | 21.75997913 | [-0.979551005929775, 0.1443796049103828, -0.14012264794774557]   | Z= 0.9113   |
|             | C11 SYM        | 21.75997913 | [-0.979551005929775, 0.14437960491038254, -0.14012264794774526]  | Tot= 4.4846 |
|             | C12 SYM        | 21.75997913 | [-0.979551005929775, 0.14437960491038276, -0.14012264794774523]  |             |
|             | C13 SYM        | 21.75997913 | [-0.979551005929775, 0.14437960491038285, -0.14012264794774554]  |             |
|             | C14 SYM        | 21.75997913 | [-0.979551005929775, 0.14437960491038265, -0.14012264794774537]  |             |
|             | C15 SYM        | 21.75997913 | [-0.979551005929775, 0.1443796049103829, -0.14012264794774543]   |             |
|             | C16 SYM        | 21.75997913 | [-0.979551005929775, 0.14437960491038293, -0.14012264794774568]  |             |
|             | C17 SYM        | 21.75997913 | [-0.979551005929775, 0.14437960491038285, -0.14012264794774548]  |             |

|             |                |             |                                                                  |             |
|-------------|----------------|-------------|------------------------------------------------------------------|-------------|
| ZINC2488345 | C18 SYM        | 21.75997913 | [-0.979551005929775, 0.14437960491038268, -0.1401226479477456]   |             |
|             | C19 SYM        | 21.75997913 | [-0.9795510059297752, 0.14437960491038257, -0.14012264794774518] |             |
|             | C20 SYM        | 21.75997913 | [-0.979551005929775, 0.1443796049103828, -0.14012264794774518]   |             |
|             | S4 SYM         | 96.3216667  | [-0.09850848487743787, 0.8824641644900733, 0.4599489936916794]   |             |
|             | S6 SYM         | 96.3216667  | [-0.09850848487743807, 0.8824641644900731, 0.45994899369168013]  |             |
|             | S8 SYM         | 96.3216667  | [-0.09850848487743792, 0.882464164490073, 0.45994899369167985]   |             |
|             | S10 SYM        | 96.3216667  | [-0.0985084848774378, 0.8824641644900734, 0.45994899369167935]   |             |
|             | S12 SYM        | 96.3216667  | [-0.09850848487743774, 0.8824641644900734, 0.45994899369167935]  |             |
|             | S14 SYM        | 96.3216667  | [-0.09850848487743762, 0.8824641644900733, 0.4599489936916796]   |             |
|             | S16 SYM        | 96.3216667  | [-0.09850848487743778, 0.882464164490073, 0.45994899369167963]   |             |
|             | S18 SYM        | 96.3216667  | [-0.09850848487743813, 0.8824641644900729, 0.45994899369167996]  |             |
|             | S20 SYM        | 96.3216667  | [-0.09850848487743692, 0.8824641644900743, 0.4599489936916782]   |             |
|             | INVERSION (S2) | 94.68763708 | [1.0, 0.0, 0.0]                                                  |             |
|             | MIRROR SYM     | 5.751807312 | [0.1436511089128776, 0.9849214832273672, 0.09640555370570508]    |             |
|             | C2 SYM         | 17.67139639 | [-0.9488041886846206, 0.25328513065018915, -0.18872534044487915] |             |
|             | C3 SYM         | 21.6724115  | [-0.9531352744911457, 0.25478300333794546, -0.16315259645738062] |             |
|             | C4 SYM         | 21.6724115  | [-0.9531352744911457, 0.25478300333794573, -0.16315259645738073] |             |
|             | C5 SYM         | 21.6724115  | [-0.9531352744911457, 0.25478300333794557, -0.16315259645738073] |             |
|             | C6 SYM         | 21.6724115  | [-0.9531352744911457, 0.2547830033379454, -0.16315259645738062]  |             |
|             | C7 SYM         | 21.6724115  | [-0.9531352744911459, 0.25478300333794535, -0.16315259645738062] | X= -3.7486  |
|             | C8 SYM         | 21.6724115  | [-0.9531352744911457, 0.2547830033379455, -0.16315259645738067]  | Y= 0.2076   |
|             | C9 SYM         | 21.6724115  | [-0.9531352744911459, 0.25478300333794524, -0.16315259645738062] | Z= 0.7553   |
|             | C10 SYM        | 21.6724115  | [-0.9531352744911457, 0.2547830033379455, -0.1631525964573806]   | Tot= 3.8295 |
|             | C11 SYM        | 21.6724115  | [-0.9531352744911457, 0.25478300333794535, -0.16315259645738056] |             |
|             | C12 SYM        | 21.6724115  | [-0.9531352744911459, 0.2547830033379453, -0.16315259645738056]  |             |
|             | C13 SYM        | 21.6724115  | [-0.9531352744911459, 0.25478300333794507, -0.1631525964573806]  |             |
|             | C14 SYM        | 21.6724115  | [-0.9531352744911457, 0.25478300333794557, -0.16315259645738053] |             |
|             | C15 SYM        | 21.6724115  | [-0.9531352744911459, 0.25478300333794496, -0.1631525964573806]  |             |

|             |                |             |                                                                   |             |
|-------------|----------------|-------------|-------------------------------------------------------------------|-------------|
| ZINC9601596 | C16 SYM        | 21.6724115  | [-0.9531352744911457, 0.25478300333794573, -0.16315259645738064]  |             |
|             | C17 SYM        | 21.6724115  | [-0.9531352744911457, 0.2547830033379453, -0.16315259645738073]   |             |
|             | C18 SYM        | 21.6724115  | [-0.9531352744911459, 0.25478300333794507, -0.16315259645738037]  |             |
|             | C19 SYM        | 21.6724115  | [-0.9531352744911457, 0.2547830033379457, -0.1631525964573806]    |             |
|             | C20 SYM        | 21.6724115  | [-0.9531352744911459, 0.25478300333794524, -0.16315259645738048]  |             |
|             | S4 SYM         | 96.29976254 | [-0.017458570550689126, 0.8775582418738583, 0.47915209530334874]  |             |
|             | S6 SYM         | 96.29976254 | [-0.017458570550688966, 0.8775582418738584, 0.4791520953033483]   |             |
|             | S8 SYM         | 96.29976254 | [-0.017458570550689327, 0.8775582418738581, 0.4791520953033494]   |             |
|             | S10 SYM        | 96.29976254 | [-0.01745857055068906, 0.8775582418738583, 0.47915209530334907]   |             |
|             | S12 SYM        | 96.29976254 | [-0.017458570550688755, 0.8775582418738587, 0.47915209530334835]  |             |
|             | S14 SYM        | 96.29976254 | [-0.017458570550689254, 0.8775582418738586, 0.47915209530334874]  |             |
|             | S16 SYM        | 96.29976254 | [-0.017458570550689213, 0.8775582418738584, 0.4791520953033486]   |             |
|             | S18 SYM        | 96.29976254 | [-0.017458570550689598, 0.8775582418738581, 0.47915209530334946]  |             |
|             | S20 SYM        | 96.29976254 | [-0.017458570550689227, 0.8775582418738582, 0.4791520953033489]   |             |
|             | INVERSION (S2) | 94.65597897 | [1.0, 0.0, 0.0]                                                   |             |
|             | MIRROR SYM     | 5.606379643 | [0.24847141843767956, 0.960951473469428, 0.12179581214681834]     |             |
|             | C2 SYM         | 20.26444167 | [0.967227445019236, -0.044182121918766304, 0.2500380165181215]    |             |
|             | C3 SYM         | 20.67769685 | [-0.9673748663411472, 0.04659686165409366, -0.24902730865396516]  |             |
|             | C4 SYM         | 20.67769685 | [-0.9673748663411472, 0.04659686165409363, -0.249027308653965]    |             |
|             | C5 SYM         | 20.67769685 | [-0.967374866341147, 0.04659686165409367, -0.24902730865396516]   |             |
|             | C6 SYM         | 20.67769685 | [-0.9673748663411472, 0.04659686165409355, -0.24902730865396489]  | X= -2.0730  |
|             | C7 SYM         | 20.67769685 | [-0.9673748663411472, 0.046596861654093755, -0.2490273086539651]  | Y= -0.6196  |
|             | C8 SYM         | 20.67769685 | [-0.9673748663411472, 0.04659686165409366, -0.24902730865396527]  | Z= -0.0767  |
|             | C9 SYM         | 20.67769685 | [-0.967374866341147, 0.046596861654093685, -0.24902730865396494]  | Tot= 2.1650 |
|             | C10 SYM        | 20.67769685 | [-0.9673748663411472, 0.04659686165409357, -0.24902730865396477]  |             |
|             | C11 SYM        | 20.67769685 | [-0.967374866341147, 0.0465968616540937, -0.2490273086539655]     |             |
|             | C12 SYM        | 20.67769685 | [-0.9673748663411472, 0.046596861654093685, -0.24902730865396505] |             |
|             | C13 SYM        | 20.67769685 | [-0.9673748663411472, 0.0465968616540935, -0.24902730865396444]   |             |

|             |                |             |                                                                   |             |
|-------------|----------------|-------------|-------------------------------------------------------------------|-------------|
| ZINC9601608 | C14 SYM        | 20.67769685 | [-0.9673748663411472, 0.04659686165409362, -0.2490273086539651]   |             |
|             | C15 SYM        | 20.67769685 | [-0.967374866341147, 0.04659686165409359, -0.24902730865396516]   |             |
|             | C16 SYM        | 20.67769685 | [-0.967374866341147, 0.046596861654093706, -0.24902730865396533]  |             |
|             | C17 SYM        | 20.67769685 | [-0.9673748663411472, 0.0465968616540935, -0.2490273086539646]    |             |
|             | C18 SYM        | 20.67769685 | [-0.9673748663411472, 0.046596861654093456, -0.24902730865396505] |             |
|             | C19 SYM        | 20.67769685 | [-0.9673748663411472, 0.04659686165409351, -0.24902730865396489]  |             |
|             | C20 SYM        | 20.67769685 | [-0.9673748663411472, 0.04659686165409365, -0.249027308653965]    |             |
|             | S4 SYM         | 97.32722361 | [-0.8231996804146058, 0.5657306349198479, -0.04786580071905857]   |             |
|             | S6 SYM         | 97.32722361 | [-0.8231996804146058, 0.565730634919848, -0.04786580071905857]    |             |
|             | S8 SYM         | 97.32722361 | [-0.823199680414606, 0.5657306349198477, -0.04786580071905846]    |             |
|             | S10 SYM        | 97.32722361 | [-0.8231996804146057, 0.5657306349198481, -0.04786580071905848]   |             |
|             | S12 SYM        | 97.32722361 | [-0.823199680414606, 0.5657306349198477, -0.04786580071905859]    |             |
|             | S14 SYM        | 97.32722361 | [-0.8231996804146061, 0.5657306349198474, -0.047865800719058604]  |             |
|             | S16 SYM        | 97.32722361 | [-0.8231996804146056, 0.5657306349198482, -0.04786580071905852]   |             |
|             | S18 SYM        | 97.32722361 | [-0.8231996804146064, 0.5657306349198471, -0.047865800719058785]  |             |
|             | S20 SYM        | 97.32722361 | [-0.8231996804146062, 0.5657306349198475, -0.04786580071905847]   |             |
|             | INVERSION (S2) | 97.11559126 | [1.0, 0.0, 0.0]                                                   |             |
|             | MIRROR SYM     | 7.460768214 | [0.004068109383117842, 0.9872603713238124, 0.15906102508036132]   |             |
|             | C2 SYM         | 24.08007003 | [-0.9100531613843446, 0.2805129580512492, -0.30514869132883143]   |             |
|             | C3 SYM         | 24.55985674 | [-0.9094413619271351, 0.28283947651302016, -0.3048249329401359]   |             |
|             | C4 SYM         | 24.56447249 | [-0.909049229559914, 0.2826817867332844, -0.3061380500457353]     |             |
|             | C5 SYM         | 24.56447249 | [-0.9090492295599137, 0.2826817867332846, -0.30613805004573547]   | X= -6.2285  |
|             | C6 SYM         | 24.56447249 | [-0.909049229559914, 0.28268178673328426, -0.30613805004573524]   | Y= 1.0135   |
|             | C7 SYM         | 24.56447249 | [-0.9090492295599137, 0.2826817867332847, -0.3061380500457356]    | Z= -2.0799  |
|             | C8 SYM         | 24.56447249 | [-0.9090492295599137, 0.28268178673328465, -0.30613805004573547]  | Tot= 6.6443 |
|             | C9 SYM         | 24.56447249 | [-0.909049229559914, 0.2826817867332839, -0.30613805004573563]    |             |
|             | C10 SYM        | 24.56447249 | [-0.9090492295599135, 0.28268178673328487, -0.30613805004573597]  |             |
|             | C11 SYM        | 24.56447249 | [-0.9090492295599135, 0.28268178673328465, -0.3061380500457357]   |             |

|             |                |             |                                                                  |             |
|-------------|----------------|-------------|------------------------------------------------------------------|-------------|
| ZINC8589983 | C12 SYM        | 24.56447249 | [-0.9090492295599137, 0.28268178673328426, -0.30613805004573524] |             |
|             | C13 SYM        | 24.56447249 | [-0.9090492295599137, 0.2826817867332843, -0.3061380500457353]   |             |
|             | C14 SYM        | 24.56447249 | [-0.9090492295599137, 0.28268178673328426, -0.3061380500457354]  |             |
|             | C15 SYM        | 24.56447249 | [-0.9090492295599142, 0.2826817867332836, -0.3061380500457349]   |             |
|             | C16 SYM        | 24.56447249 | [-0.9090492295599137, 0.2826817867332845, -0.3061380500457352]   |             |
|             | C17 SYM        | 24.56447249 | [-0.9090492295599135, 0.282681786733285, -0.30613805004573585]   |             |
|             | C18 SYM        | 24.56447249 | [-0.909049229559914, 0.28268178673328437, -0.3061380500457351]   |             |
|             | C19 SYM        | 24.56447249 | [-0.9090492295599137, 0.28268178673328453, -0.30613805004573563] |             |
|             | C20 SYM        | 24.56447249 | [-0.9090492295599137, 0.28268178673328487, -0.30613805004573524] |             |
|             | S4 SYM         | 99.60007075 | [0.11887578488768842, 0.9829770032963924, -0.14008839622816946]  |             |
|             | S6 SYM         | 99.60007075 | [0.11887578488768867, 0.9829770032963923, -0.14008839622816874]  |             |
|             | S8 SYM         | 99.60007075 | [0.1188757848876891, 0.9829770032963924, -0.1400883962281688]    |             |
|             | S10 SYM        | 99.60007075 | [0.11887578488768927, 0.9829770032963924, -0.14008839622816874]  |             |
|             | S12 SYM        | 99.60007075 | [0.11887578488768864, 0.9829770032963923, -0.1400883962281696]   |             |
|             | S14 SYM        | 99.60007075 | [0.11887578488768837, 0.9829770032963923, -0.1400883962281692]   |             |
|             | S16 SYM        | 99.60007075 | [0.11887578488768911, 0.9829770032963921, -0.14008839622816954]  |             |
|             | S18 SYM        | 99.60007075 | [0.11887578488768749, 0.9829770032963921, -0.14008839622817104]  |             |
|             | S20 SYM        | 99.60007075 | [0.118875784887689, 0.9829770032963924, -0.14008839622816846]    |             |
|             | INVERSION (S2) | 99.44961417 | [1.0, 0.0, 0.0]                                                  |             |
|             | MIRROR SYM     | 7.477888747 | [-0.1783005176546555, -0.927292310437435, -0.3291472260367474]   |             |
|             | C2 SYM         | 25.94479747 | [-0.9312501985373083, 0.2623489492180896, -0.2528756543607714]   |             |
|             | C3 SYM         | 26.22662571 | [0.9331698090739374, -0.2573050276259713, 0.2509745608449379]    |             |
|             | C4 SYM         | 26.22662571 | [0.9331698090739374, -0.25730502762597096, 0.2509745608449378]   | X= 3.3957   |
|             | C5 SYM         | 26.22662571 | [0.9331698090739374, -0.2573050276259715, 0.2509745608449379]    | Y= 1.6433   |
|             | C6 SYM         | 26.22662571 | [0.9331698090739374, -0.25730502762597135, 0.25097456084493786]  | Z= 0.6083   |
|             | C7 SYM         | 26.22662571 | [0.9331698090739374, -0.2573050276259713, 0.25097456084493763]   | Tot= 3.8211 |
|             | C8 SYM         | 26.22662571 | [0.9331698090739377, -0.257305027625971, 0.2509745608449377]     |             |
|             | C9 SYM         | 26.22662571 | [0.9331698090739374, -0.257305027625971, 0.25097456084493797]    |             |

|               |                |             |                                                                   |                                                      |
|---------------|----------------|-------------|-------------------------------------------------------------------|------------------------------------------------------|
|               | C10 SYM        | 26.22662571 | [0.9331698090739372, -0.25730502762597135, 0.2509745608449382]    |                                                      |
|               | C11 SYM        | 26.22662571 | [0.9331698090739372, -0.2573050276259716, 0.2509745608449381]     |                                                      |
|               | C12 SYM        | 26.22662571 | [0.9331698090739377, -0.2573050276259708, 0.2509745608449377]     |                                                      |
|               | C13 SYM        | 26.22662571 | [0.9331698090739374, -0.2573050276259715, 0.25097456084493786]    |                                                      |
|               | C14 SYM        | 26.22662571 | [0.9331698090739372, -0.2573050276259718, 0.2509745608449383]     |                                                      |
|               | C15 SYM        | 26.22662571 | [0.9331698090739374, -0.2573050276259713, 0.2509745608449382]     |                                                      |
|               | C16 SYM        | 26.22662571 | [0.9331698090739374, -0.2573050276259715, 0.25097456084493813]    |                                                      |
|               | C17 SYM        | 26.22662571 | [0.9331698090739377, -0.25730502762597124, 0.2509745608449374]    |                                                      |
|               | C18 SYM        | 26.22662571 | [0.9331698090739372, -0.2573050276259716, 0.25097456084493824]    |                                                      |
|               | C19 SYM        | 26.22662571 | [0.9331698090739372, -0.2573050276259718, 0.2509745608449383]     |                                                      |
|               | C20 SYM        | 26.22662571 | [0.9331698090739377, -0.2573050276259711, 0.2509745608449374]     |                                                      |
|               | S4 SYM         | 99.62334649 | [0.7482544567352265, 0.6623752861598822, 0.037070854596102265]    |                                                      |
|               | S6 SYM         | 99.62334649 | [0.7482544567352251, 0.662375286159884, 0.03707085459610304]      |                                                      |
|               | S8 SYM         | 99.62334649 | [0.7482544567352248, 0.662375286159884, 0.03707085459610221]      |                                                      |
|               | S10 SYM        | 99.62334649 | [0.7482544567352246, 0.6623752861598843, 0.03707085459610249]     |                                                      |
|               | S12 SYM        | 99.62334649 | [0.7482544567352264, 0.6623752861598823, 0.03707085459610188]     |                                                      |
|               | S14 SYM        | 99.62334649 | [0.7482544567352227, 0.6623752861598816, 0.037070854596102334]    |                                                      |
|               | S16 SYM        | 99.62334649 | [0.7482544567352257, 0.6623752861598833, 0.03707085459610152]     |                                                      |
|               | S18 SYM        | 99.62334649 | [0.7482544567352282, 0.6623752861598802, 0.03707085459610227]     |                                                      |
|               | S20 SYM        | 99.62334649 | [0.748254456735226, 0.6623752861598831, 0.037070854596102425]     |                                                      |
| ZINC524732009 | INVERSION (S2) | 99.48607822 | [1.0, 0.0, 0.0]                                                   | X= 1.3041<br>Y= -1.0397<br>Z= -0.3033<br>Tot= 1.6952 |
|               | MIRROR SYM     | 10.03930765 | [-0.01464793373856027, -0.7213541529858972, -0.6924114557163172]  |                                                      |
|               | C2 SYM         | 48.2534009  | [-0.8127497462420433, 0.5821164893280554, 0.024046680350396966]   |                                                      |
|               | C3 SYM         | 50.72262313 | [0.8449971706563201, -0.5347225785453804, -0.0071795248166856285] |                                                      |
|               | C4 SYM         | 50.72262313 | [0.844997170656319, -0.5347225785453825, -0.007179524816683465]   |                                                      |
|               | C5 SYM         | 50.72262313 | [0.8449971706563207, -0.5347225785453793, -0.00717952481668635]   |                                                      |
|               | C6 SYM         | 50.72262313 | [0.8449971706563196, -0.5347225785453812, -0.007179524816684492]  |                                                      |
|               | C7 SYM         | 50.72262313 | [0.8449971706563201, -0.5347225785453804, -0.007179524816685243]  |                                                      |

|             |                |             |                                                                   |             |
|-------------|----------------|-------------|-------------------------------------------------------------------|-------------|
| ZINC3984976 | C8 SYM         | 50.72262313 | [0.8449971706563207, -0.5347225785453794, -0.007179524816685849]  |             |
|             | C9 SYM         | 50.72262313 | [0.8449971706563194, -0.5347225785453815, -0.0071795248166845235] |             |
|             | C10 SYM        | 50.72262313 | [0.8449971706563197, -0.534722578545381, -0.007179524816684829]   |             |
|             | C11 SYM        | 50.72262313 | [0.84499717065632, -0.5347225785453807, -0.0071795248166847975]   |             |
|             | C12 SYM        | 50.72262313 | [0.8449971706563199, -0.5347225785453807, -0.007179524816684988]  |             |
|             | C13 SYM        | 50.72262313 | [0.8449971706563197, -0.5347225785453811, -0.007179524816684683]  |             |
|             | C15 SYM        | 50.72262313 | [0.8449971706563207, -0.5347225785453795, -0.007179524816686714]  |             |
|             | C14 SYM        | 50.72262313 | [0.8449971706563199, -0.5347225785453811, -0.007179524816684437]  |             |
|             | C16 SYM        | 50.72262313 | [0.8449971706563204, -0.5347225785453802, -0.007179524816686134]  |             |
|             | C17 SYM        | 50.72262313 | [0.8449971706563197, -0.5347225785453811, -0.007179524816684352]  |             |
|             | C18 SYM        | 50.72262313 | [0.8449971706563224, -0.5347225785453766, -0.0071795248166894345] |             |
|             | C19 SYM        | 50.72262313 | [0.8449971706563223, -0.5347225785453767, -0.007179524816688569]  |             |
|             | C20 SYM        | 50.72262313 | [0.8449971706563196, -0.5347225785453813, -0.007179524816685656]  |             |
|             | S4 SYM         | 96.63320722 | [0.7115242496624653, 0.38486788611024847, 0.5878860028809111]     |             |
|             | S6 SYM         | 96.63320722 | [0.7115242496624653, 0.38486788611024836, 0.587886002880911]      |             |
|             | S8 SYM         | 96.63320722 | [0.7115242496624653, 0.3848678861102485, 0.5878860028809111]      |             |
|             | S10 SYM        | 96.63320722 | [0.711524249662465, 0.38486788611024875, 0.5878860028809113]      |             |
|             | S12 SYM        | 96.63320722 | [0.7115242496624651, 0.38486788611024864, 0.5878860028809113]     |             |
|             | S14 SYM        | 96.63320722 | [0.7115242496624651, 0.3848678861102486, 0.5878860028809112]      |             |
|             | S16 SYM        | 96.63320722 | [0.7115242496624653, 0.3848678861102484, 0.587886002880911]       |             |
|             | S18 SYM        | 96.63320722 | [0.7115242496624655, 0.3848678861102483, 0.5878860028809109]      |             |
|             | S20 SYM        | 96.63320722 | [0.7115242496624652, 0.3848678861102486, 0.5878860028809112]      |             |
|             | INVERSION (S2) | 96.63320715 | [1.0, 0.0, 0.0]                                                   |             |
|             | MIRROR SYM     | 6.034559767 | [0.4334352953551223, 0.5765498701150279, 0.6926211749656246]      |             |
|             | C2 SYM         | 21.83979639 | [-0.8737354074943344, -0.17932894552088316, 0.4521366684854013]   | X= 1.6984   |
|             | C3 SYM         | 22.3858577  | [-0.875408693316454, -0.17494469952877736, 0.4506151038000887]    | Y= 3.3236   |
|             | C4 SYM         | 22.3858577  | [-0.8754086933164538, -0.17494469952877753, 0.4506151038000889]   | Z= -3.7647  |
|             | C5 SYM         | 22.3858577  | [-0.8754086933164542, -0.17494469952877728, 0.45061510380008823]  | Tot= 5.3013 |

---

|                |             |                                                                  |
|----------------|-------------|------------------------------------------------------------------|
| C6 SYM         | 22.3858577  | [-0.875408693316454, -0.1749446995287773, 0.4506151038000885]    |
| C7 SYM         | 22.3858577  | [-0.875408693316454, -0.17494469952877767, 0.4506151038000886]   |
| C8 SYM         | 22.3858577  | [-0.8754086933164538, -0.1749446995287775, 0.4506151038000891]   |
| C9 SYM         | 22.3858577  | [-0.8754086933164535, -0.17494469952877728, 0.4506151038000891]  |
| C10 SYM        | 22.3858577  | [-0.8754086933164538, -0.1749446995287773, 0.4506151038000888]   |
| C11 SYM        | 22.3858577  | [-0.8754086933164542, -0.17494469952877734, 0.4506151038000885]  |
| C12 SYM        | 22.3858577  | [-0.875408693316454, -0.1749446995287774, 0.45061510380008846]   |
| C13 SYM        | 22.3858577  | [-0.8754086933164535, -0.1749446995287776, 0.45061510380008946]  |
| C15 SYM        | 22.3858577  | [-0.8754086933164538, -0.17494469952877736, 0.4506151038000888]  |
| C14 SYM        | 22.3858577  | [-0.8754086933164542, -0.1749446995287771, 0.450615103800088]    |
| C16 SYM        | 22.3858577  | [-0.8754086933164544, -0.17494469952877706, 0.45061510380008796] |
| C17 SYM        | 22.3858577  | [-0.8754086933164541, -0.1749446995287776, 0.45061510380008807]  |
| C18 SYM        | 22.3858577  | [-0.8754086933164544, -0.1749446995287775, 0.45061510380008796]  |
| C19 SYM        | 22.3858577  | [-0.875408693316454, -0.17494469952877736, 0.4506151038000886]   |
| C20 SYM        | 22.3858577  | [-0.8754086933164538, -0.17494469952877745, 0.45061510380008907] |
| S4 SYM         | 99.41270981 | [0.5245413088954336, -0.8492356548194772, 0.06045839764333173]   |
| S6 SYM         | 99.41270981 | [0.5245413088954332, -0.8492356548194775, 0.06045839764333212]   |
| S8 SYM         | 99.41270981 | [0.5245413088954333, -0.8492356548194774, 0.06045839764333197]   |
| S10 SYM        | 99.41270981 | [0.5245413088954327, -0.8492356548194777, 0.06045839764333223]   |
| S12 SYM        | 99.41270981 | [0.5245413088954328, -0.8492356548194776, 0.0604583976433318]    |
| S14 SYM        | 99.41270981 | [0.5245413088954343, -0.8492356548194768, 0.06045839764333169]   |
| S16 SYM        | 99.41270981 | [0.5245413088954319, -0.8492356548194783, 0.060458397643331954]  |
| S18 SYM        | 99.41270981 | [0.5245413088954344, -0.8492356548194767, 0.060458397643331246]  |
| S20 SYM        | 99.41270981 | [0.524541308895433, -0.8492356548194776, 0.06045839764333172]    |
| INVERSION (S2) | 99.31060232 | [1.0, 0.0, 0.0]                                                  |
| MIRROR SYM     | 6.068432112 | [-0.35003500325789333, -0.41348205543433597, -0.840540353777285] |

---
